# Supplementary material for: Full-Day Physical Activity and Sedentary Behaviour Levels of Typically Developing Children and Adolescents in the Middle East: A Systematic Review
Source: MDPI journal article supplement (doi:10.3390/ijerph20206940), 2023-10-19
Supplement: s1 [file s1]

## Supplementary Material

Table S1. PRISMA 2020 checklist

| Section and Topic             | Item # | Checklist item                                                                                                                                                                                                                                                                                       | Location where item is reported |
|-------------------------------|--------|------------------------------------------------------------------------------------------------------------------------------------------------------------------------------------------------------------------------------------------------------------------------------------------------------|---------------------------------|
| <b>TITLE</b>                  |        |                                                                                                                                                                                                                                                                                                      |                                 |
| Title                         | 1      | Identify the report as a systematic review.                                                                                                                                                                                                                                                          | Title                           |
| <b>ABSTRACT</b>               |        |                                                                                                                                                                                                                                                                                                      |                                 |
| Abstract                      | 2      | See the PRISMA 2020 for Abstracts checklist.                                                                                                                                                                                                                                                         | Abstract                        |
| <b>INTRODUCTION</b>           |        |                                                                                                                                                                                                                                                                                                      |                                 |
| Rationale                     | 3      | Describe the rationale for the review in the context of existing knowledge.                                                                                                                                                                                                                          | End Introduction                |
| Objectives                    | 4      | Provide an explicit statement of the objective(s) or question(s) the review addresses.                                                                                                                                                                                                               | End Introduction                |
| <b>METHODS</b>                |        |                                                                                                                                                                                                                                                                                                      |                                 |
| Eligibility criteria          | 5      | Specify the inclusion and exclusion criteria for the review and how studies were grouped for the syntheses.                                                                                                                                                                                          | Section 2.3                     |
| Information sources           | 6      | Specify all databases, registers, websites, organisations, reference lists and other sources searched or consulted to identify studies. Specify the date when each source was last searched or consulted.                                                                                            | Section 2.2                     |
| Search strategy               | 7      | Present the full search strategies for all databases, registers and websites, including any filters and limits used.                                                                                                                                                                                 | Table S2                        |
| Selection process             | 8      | Specify the methods used to decide whether a study met the inclusion criteria of the review, including how many reviewers screened each record and each report retrieved, whether they worked independently, and if applicable, details of automation tools used in the process.                     | Section 2.4                     |
| Data collection process       | 9      | Specify the methods used to collect data from reports, including how many reviewers collected data from each report, whether they worked independently, any processes for obtaining or confirming data from study investigators, and if applicable, details of automation tools used in the process. | Section 2.5                     |
| Data items                    | 10a    | List and define all outcomes for which data were sought. Specify whether all results that were compatible with each outcome domain in each study were sought (e.g. for all measures, time points, analyses), and if not, the methods used to decide which results to collect.                        | Section 2.5                     |
|                               | 10b    | List and define all other variables for which data were sought (e.g. participant and intervention characteristics, funding sources). Describe any assumptions made about any missing or unclear information.                                                                                         | Section 2.7                     |
| Study risk of bias assessment | 11     | Specify the methods used to assess risk of bias in the included studies, including details of the tool(s) used, how many reviewers assessed each study and whether they worked independently, and if applicable, details of automation tools used in the process.                                    | Section 2.6                     |
| Effect measures               | 12     | Specify for each outcome the effect measure(s) (e.g. risk ratio, mean difference) used in the synthesis or presentation of results.                                                                                                                                                                  | Section 2.7                     |
| Synthesis methods             | 13a    | Describe the processes used to decide which studies were eligible for each synthesis (e.g. tabulating the study intervention characteristics and comparing against the planned groups for each synthesis (item #5)).                                                                                 | Section 2.7                     |



| Section and Topic             | Item # | Checklist item                                                                                                                                                                                                                                                                       | Location where item is reported |
|-------------------------------|--------|--------------------------------------------------------------------------------------------------------------------------------------------------------------------------------------------------------------------------------------------------------------------------------------|---------------------------------|
|                               | 13b    | Describe any methods required to prepare the data for presentation or synthesis, such as handling of missing summary statistics, or data conversions.                                                                                                                                | Section 2.7                     |
|                               | 13c    | Describe any methods used to tabulate or visually display results of individual studies and syntheses.                                                                                                                                                                               | Section 2.7                     |
|                               | 13d    | Describe any methods used to synthesize results and provide a rationale for the choice(s). If meta-analysis was performed, describe the model(s), method(s) to identify the presence and extent of statistical heterogeneity, and software package(s) used.                          | Section 2.7                     |
|                               | 13e    | Describe any methods used to explore possible causes of heterogeneity among study results (e.g. subgroup analysis, meta-regression).                                                                                                                                                 | Section 2.7                     |
|                               | 13f    | Describe any sensitivity analyses conducted to assess robustness of the synthesized results.                                                                                                                                                                                         | NA                              |
| Reporting bias assessment     | 14     | Describe any methods used to assess risk of bias due to missing results in a synthesis (arising from reporting biases).                                                                                                                                                              | NA                              |
| Certainty assessment          | 15     | Describe any methods used to assess certainty (or confidence) in the body of evidence for an outcome.                                                                                                                                                                                | Section 2.7                     |
| <b>RESULTS</b>                |        |                                                                                                                                                                                                                                                                                      |                                 |
| Study selection               | 16a    | Describe the results of the search and selection process, from the number of records identified in the search to the number of studies included in the review, ideally using a flow diagram.                                                                                         | Figure 1                        |
|                               | 16b    | Cite studies that might appear to meet the inclusion criteria, but which were excluded, and explain why they were excluded.                                                                                                                                                          | Section 3.1                     |
| Study characteristics         | 17     | Cite each included study and present its characteristics.                                                                                                                                                                                                                            | Table S4/S5                     |
| Risk of bias in studies       | 18     | Present assessments of risk of bias for each included study.                                                                                                                                                                                                                         | Table 5                         |
| Results of individual studies | 19     | For all outcomes, present, for each study: (a) summary statistics for each group (where appropriate) and (b) an effect estimate and its precision (e.g. confidence/credible interval), ideally using structured tables or plots.                                                     | Table S4                        |
| Results of syntheses          | 20a    | For each synthesis, briefly summarise the characteristics and risk of bias among contributing studies.                                                                                                                                                                               | NA                              |
|                               | 20b    | Present results of all statistical syntheses conducted. If meta-analysis was done, present for each the summary estimate and its precision (e.g. confidence/credible interval) and measures of statistical heterogeneity. If comparing groups, describe the direction of the effect. | Table 6/7                       |
|                               | 20c    | Present results of all investigations of possible causes of heterogeneity among study results.                                                                                                                                                                                       | NA                              |
|                               | 20d    | Present results of all sensitivity analyses conducted to assess the robustness of the synthesized results.                                                                                                                                                                           | Narrative sections 3.5/3.6      |
| Reporting biases              | 21     | Present assessments of risk of bias due to missing results (arising from reporting biases) for each synthesis assessed.                                                                                                                                                              | NA                              |
| Certainty of evidence         | 22     | Present assessments of certainty (or confidence) in the body of evidence for each outcome assessed.                                                                                                                                                                                  | As appropriate sections         |



| Section and Topic                              | Item # | Checklist item                                                                                                                                                                                                                             | Location where item is reported |
|------------------------------------------------|--------|--------------------------------------------------------------------------------------------------------------------------------------------------------------------------------------------------------------------------------------------|---------------------------------|
|                                                |        |                                                                                                                                                                                                                                            | 3.5/3.6                         |
| <b>DISCUSSION</b>                              |        |                                                                                                                                                                                                                                            |                                 |
| Discussion                                     | 23a    | Provide a general interpretation of the results in the context of other evidence.                                                                                                                                                          | Sections 4.1/4.2                |
|                                                | 23b    | Discuss any limitations of the evidence included in the review.                                                                                                                                                                            | Sections 4.1/4.2/4.3            |
|                                                | 23c    | Discuss any limitations of the review processes used.                                                                                                                                                                                      | Section 4.3                     |
|                                                | 23d    | Discuss implications of the results for practice, policy, and future research.                                                                                                                                                             | Conclusion section              |
| <b>OTHER INFORMATION</b>                       |        |                                                                                                                                                                                                                                            |                                 |
| Registration and protocol                      | 24a    | Provide registration information for the review, including register name and registration number, or state that the review was not registered.                                                                                             | NA                              |
|                                                | 24b    | Indicate where the review protocol can be accessed, or state that a protocol was not prepared.                                                                                                                                             | Not prepared                    |
|                                                | 24c    | Describe and explain any amendments to information provided at registration or in the protocol.                                                                                                                                            | NA                              |
| Support                                        | 25     | Describe sources of financial or non-financial support for the review, and the role of the funders or sponsors in the review.                                                                                                              | Funding section                 |
| Competing interests                            | 26     | Declare any competing interests of review authors.                                                                                                                                                                                         | Conflict of Interest section    |
| Availability of data, code and other materials | 27     | Report which of the following are publicly available and where they can be found: template data collection forms; data extracted from included studies; data used for all analyses; analytic code; any other materials used in the review. | Data Availability Statement     |



Table S2. Search terms used within the CINAHL, MEDLINE, Web of Science and PsychoINFO databases.

| Search terms                                                                                                                                                                                                                                                                                                                                                                                                                                                                                                                                                                                                                                                                                                                                                                                                                                                                 |
|------------------------------------------------------------------------------------------------------------------------------------------------------------------------------------------------------------------------------------------------------------------------------------------------------------------------------------------------------------------------------------------------------------------------------------------------------------------------------------------------------------------------------------------------------------------------------------------------------------------------------------------------------------------------------------------------------------------------------------------------------------------------------------------------------------------------------------------------------------------------------|
| <p>Characteristics of interest:</p> <p>“physical activit*” OR sedentary OR (MH “Sedentary Behavior”) OR sitting OR “physical inactivit*” OR “step count”</p> <p>Population:</p> <p>AND child* OR (MH “Child”) OR (MH “Child, Preschool”) OR *adolescent* OR (MH “Adolescent”) OR *teenager*</p> <p>Country/location:</p> <p>AND Bahrain OR (MH “Bahrain”) OR Cyprus OR (MH “Cyprus”) OR Egypt OR (MH “Egypt”) OR Iran OR (MH “Iran”) OR Iraq OR (MH “Iraq”) OR Israel OR Jordan OR (MH “Jordan”) OR Kuwait OR (MH “Kuwait”) OR Lebanon OR (MH “Lebanon”) OR Oman OR (MH “Oman”) OR Palestine OR Qatar OR (MH “Qatar”) OR Saudi Arabia OR (MH “Saudi Arabia”) OR Syria OR (MH “Syria”) OR Turkey OR (MH “Turkey”) OR United Arab Emirates OR (MH “United Arab Emirates”) OR Yemen OR (MH “Yemen”) OR “Gulf countr*” OR “Middle East” OR (MH “Middle East”) OR GCC OR Arab</p> |



Table S3. Quality assessment criteria with definitions used to facilitate scoring (adapted from Chaabane et al (2020)).

| Criteria's name                                                                            | Criteria's scoring<br>(Max score of 3/ criteria)                                                                    | Criteria's definition                                                                                                                                                                                                                                                                                                                                                    | Remarks                                                                                                                                                                                                                                                                                                                                                          |
|--------------------------------------------------------------------------------------------|---------------------------------------------------------------------------------------------------------------------|--------------------------------------------------------------------------------------------------------------------------------------------------------------------------------------------------------------------------------------------------------------------------------------------------------------------------------------------------------------------------|------------------------------------------------------------------------------------------------------------------------------------------------------------------------------------------------------------------------------------------------------------------------------------------------------------------------------------------------------------------|
| 0. Population characteristics<br><br>Nationality, type of population, age groups           | For inclusion in the review the journal article had to include information that would allow all criteria to be met. | The following characteristics were specified:<br>a) Nationality<br>b) Population type (typically developing)<br>c) Age group                                                                                                                                                                                                                                             | If nationality was not stated the country of residence was used. If the country was not stated, the country in which the research committee board gave approval was assumed as the country.<br><br>If no population type was stated, the children were assumed to be typically developing.<br><br>Age group could either mean the age range, or the mean of age. |
| 1. Outcome definition<br><br>Physical activity/Sedentary behaviour definition in the study | 0 Not defined                                                                                                       | No definition                                                                                                                                                                                                                                                                                                                                                            |                                                                                                                                                                                                                                                                                                                                                                  |
|                                                                                            | 1 Unclear non-standard definition                                                                                   | Any incomplete /partial definition of the outcome.                                                                                                                                                                                                                                                                                                                       | Screen time is unclear definition                                                                                                                                                                                                                                                                                                                                |
|                                                                                            | 2 Clear non-standard definition                                                                                     | <b>PA:</b> The stated definition of PA is clear (time and duration) but not a daily volume of all PA. Example might be 'exercise in last week'.<br><br><b>SB:</b> Any clear definition (time and duration) of only one type of SB using mean time/day or week (e.g. mean time spent watching TV only), but not total daily sedentary behaviour. Must be/involve sitting. |                                                                                                                                                                                                                                                                                                                                                                  |
|                                                                                            | 3 Standard definition.<br>Clearly stated definition of                                                              | <b>PA:</b> Any measure of daily PA including: Steps, time in MVPA/MPA/VPA, total minutes spend in PA, TEE, PAL on a                                                                                                                                                                                                                                                      |                                                                                                                                                                                                                                                                                                                                                                  |



|                                                                              |                                                                             |                                                                                                                                                                                                     |                                                                                                                                                                                          |
|------------------------------------------------------------------------------|-----------------------------------------------------------------------------|-----------------------------------------------------------------------------------------------------------------------------------------------------------------------------------------------------|------------------------------------------------------------------------------------------------------------------------------------------------------------------------------------------|
|                                                                              | PA/SB. Units expressed per day in recognized units: min or hrs/d, METs/day. | typical day<br><b>SB:</b> Minutes spent in SB on a typical day. – all sedentary behaviour, not just category.<br>Any waking, non-standing, behaviour with an energy expenditure of $\leq 1.5$ METs. |                                                                                                                                                                                          |
| 2. Measurement methodology<br><br>Physical activity instrument or used items | 0 Not defined                                                               | The used instrument was not defined                                                                                                                                                                 |                                                                                                                                                                                          |
|                                                                              | 1 A non-validated questionnaire (subjective)                                | Use of a non-validated and non-standard questionnaire                                                                                                                                               |                                                                                                                                                                                          |
|                                                                              | 2 Validated questionnaire (subjective)                                      | Use of a validated standard PA or SB instrument                                                                                                                                                     | We trusted the studies when stating the validity and reliability of the outcome measures used.                                                                                           |
|                                                                              | 3 A gold standard (objective)                                               | Used an objective instrument, such as, accelerometer or pedometer                                                                                                                                   |                                                                                                                                                                                          |
| 3. Setting<br><br>Setting                                                    | 0 Not defined/ not clearly defined                                          | No definition                                                                                                                                                                                       |                                                                                                                                                                                          |
|                                                                              | 3 Clearly defined (1 point for each characteristic)                         | The following characteristics were specified:<br>a) Region/city (1 point)<br>b) Specific location, e.g. hospital, school (1 point)<br>c) Urban or rural (1 point)                                   | For the location, for confidentiality purposes the name of the school/hospital shouldn't be stated.<br>Urban and rural, only given a point when stated deliberately, no assumptions made |
| 4. Timing                                                                    | 0 Not defined                                                               | Data collection time not stated (years of data collection, season of data collection)                                                                                                               | Only giving a season/month without a year was scored zero.                                                                                                                               |
|                                                                              | 2 Years defined                                                             | Data collection year(s) stated.                                                                                                                                                                     |                                                                                                                                                                                          |



|                                 |                                     |                                                                                                                                                                                                     |                                                                                                                         |
|---------------------------------|-------------------------------------|-----------------------------------------------------------------------------------------------------------------------------------------------------------------------------------------------------|-------------------------------------------------------------------------------------------------------------------------|
| Years/season of data collection | 3 Clearly defined years and seasons | Data collection year(s) and season(s) (months) stated                                                                                                                                               |                                                                                                                         |
| 5. Sampling                     | 0 Not defined                       | Not stated                                                                                                                                                                                          |                                                                                                                         |
| Sampling method                 | 1 Unclear                           | Self-selection or unclear method                                                                                                                                                                    | If stated convenient sample or not stated at all                                                                        |
|                                 | 2 Non-random sampling               | Clearly defined non-random sampling method (e.g. mechanism of selecting school/class/participants)                                                                                                  | Clear description of how sample recruited in relation to wider population.                                              |
|                                 | 3 Random sampling                   | Clearly defined random sampling (random at level of country region or city or school)                                                                                                               | If stated an element of randomisation, which could represent the population, or stated a stratified multistage sampling |
| 6. Response rate                | 0 Not defined                       | The response rate was not reported for the study population generating the specific extracted data.<br>e.g. only the overall response rate and the males and female's response rate are not stated. |                                                                                                                         |
| Response rate (%)               | 1 <49%                              | Low response rate                                                                                                                                                                                   |                                                                                                                         |
|                                 | 2 50-79%                            | Acceptable response rate in this context                                                                                                                                                            |                                                                                                                         |
|                                 | 3 >=80%                             | Standard response rate                                                                                                                                                                              |                                                                                                                         |



Table S4. Reference list of all papers included in the review.

| Rayyan ID number | Reference                                                                                                                                                                                                                                                                                                                                                                                                                                                                                                                                                                    |
|------------------|------------------------------------------------------------------------------------------------------------------------------------------------------------------------------------------------------------------------------------------------------------------------------------------------------------------------------------------------------------------------------------------------------------------------------------------------------------------------------------------------------------------------------------------------------------------------------|
| 664537285        | Abasi, M. H., Eslami, A. A., Rakhshani, F., & Shiri, M. (2016a). A self-efficacy questionnaire regarding leisure time physical activity: Psychometric properties among Iranian male adolescents. <i>Iranian Journal of Nursing and Midwifery Research</i> , 21(1), 20–28. <a href="https://doi.org/10.4103/1735-9066.174751">https://doi.org/10.4103/1735-9066.174751</a>                                                                                                                                                                                                    |
| 664537249        | Abasi, M. H., Eslami, A. A., Rakhshani, F., & Shiri, M. (2016b). Development and psychometric properties of a self-regulation scale about leisure time physical activity in Iranian male adolescents. <i>Iranian Journal of Nursing and Midwifery Research</i> , 21(2), 183–190. <a href="https://doi.org/10.4103/1735-9066.178246">https://doi.org/10.4103/1735-9066.178246</a>                                                                                                                                                                                             |
| 664536008        | Abdulaziz, J. S., & Hassan, M. K. (2019). Nutritional status of children and adolescents with haemophilia in Basra, Iraq. <i>Haemophilia: The Official Journal of the World Federation of Hemophilia</i> , 25(6), e353–e360. <a href="https://doi.org/10.1111/hae.13837">https://doi.org/10.1111/hae.13837</a>                                                                                                                                                                                                                                                               |
| 664536361        | Abiri, B., Sarbakhsh, P., & Vafa, M. (2019). Prevalence of overweight, obesity, and associated risk factors in healthy female adolescents in Tehran, Iran. <i>Central Asian Journal of Global Health</i> , 8(1). <a href="https://doi.org/10.5195/cajgh.2019.413">https://doi.org/10.5195/cajgh.2019.413</a>                                                                                                                                                                                                                                                                 |
| 664536766        | Ahmed, H. S., Khalid, M. E. M., Osman, O. M., Ballal, M. A., & Al-Hashem, F. H. (2016). The association between physical activity and overweight and obesity in a population of children at high and low altitudes in Southwestern Saudi Arabia. <i>Journal of Family &amp; Community Medicine</i> , 23(2), 82–87. <a href="https://doi.org/10.4103/2230-8229.181011">https://doi.org/10.4103/2230-8229.181011</a>                                                                                                                                                           |
| 664534737        | Akbulut, G., Yildirim, M., Sanlier, N., van Stralen, M. M., Acar-Tek, N., Bilici, S., Brug, J., de Meij, J. S. B., Gezmen-Karadag, M., Koksall, E., Oenema, A., Singh, A. S., te Velde, S. J., Yildiran, H., & Chinapaw, M. J. M. (2014). Comparison of energy balance-related behaviours and measures of body composition between Turkish adolescents in Turkey and Turkish immigrant adolescents in the Netherlands. <i>Public Health Nutrition</i> , 17(12), 2692–2699. <a href="https://doi.org/10.1017/S1368980013003388">https://doi.org/10.1017/S1368980013003388</a> |
| 664535353        | Akman, M., Akan, H., Izbirak, G., Tanrıöver, Ö., Tilev, S. M., Yildiz, A., Tektaş, S., Vitrinel, A., & Hayran, O. (2010). Eating patterns of Turkish adolescents: A cross-sectional survey. <i>Nutrition Journal</i> , 9, 67. <a href="https://doi.org/10.1186/1475-2891-9-67">https://doi.org/10.1186/1475-2891-9-67</a>                                                                                                                                                                                                                                                    |
| 664540104        | Aktürk, S., Büyükavcı, R., & Aktürk, Ü. (2019). Relationship between musculoskeletal disorders and physical inactivity in adolescents. <i>Journal of Public Health</i> , 27(1), 49–56. <a href="https://doi.org/10.1007/s10389-018-0923-7">https://doi.org/10.1007/s10389-018-0923-7</a>                                                                                                                                                                                                                                                                                     |
| 664537911        | Al Barwani, S., Al Abri, M., Al Hashmi, K., Al Shukeiry, M., Tahlilkar, K., Al Zuheibi, T., Al Rawas, O., & Hassan, M. O. (2001). Assessment of aerobic fitness and its correlates in Omani adolescents using the 20-metre shuttle run test: A pilot study. <i>Journal for Scientific Research. Medical Sciences</i> , 3(2), 77–80.                                                                                                                                                                                                                                          |
| 664540288        | Al Yazeedi, B. (2018). <i>Childhood Obesity and Family Influence on Children's Nutrition Intake, Physical Activity Patterns, and BMI Z-scores in Oman</i> . ProQuest Dissertations Publishing.                                                                                                                                                                                                                                                                                                                                                                               |
| 664535963        | Alaca, N., & Yüksel, M. (2021). Comparison of physical functions and psychosocial conditions between adolescents with pectus excavatum, pectus carinatum and healthy controls. <i>Pediatric Surgery International</i> , 37(6), 765–775. <a href="https://doi.org/10.1007/s00383-021-04857-7">https://doi.org/10.1007/s00383-021-04857-7</a>                                                                                                                                                                                                                                  |
| 664534253        | Alamolhoda, M., Heydari, S. T., Ayatollahi, S. M. T., Tabrizi, R., Akbari, M., & Ardalan, A. (2020). A multivariate multilevel analysis of the risk factors associated with anthropometric indices in Iranian mid-adolescents. <i>BMC Pediatrics</i> , 20(1), 191. <a href="https://doi.org/10.1186/s12887-020-02104-x">https://doi.org/10.1186/s12887-020-02104-x</a>                                                                                                                                                                                                       |
| 664538742        | Albarwani, S., Al-Hashmi, K., Al-Abri, M., Jaju, D., & Hassan, M. O. (2009). Effects of overweight and leisure-time activities on aerobic fitness in urban and rural adolescents. <i>Metabolic Syndrome and Related Disorders</i> , 7(4), 369–374. <a href="https://doi.org/10.1089/met.2008.0052">https://doi.org/10.1089/met.2008.0052</a>                                                                                                                                                                                                                                 |
| 664536958        | Alghadir, A. H., Gabr, S. A., & Al-Eisa, E. (2016). Effects of Physical Activity on Trace Elements and Depression Related Biomarkers in Children and Adolescents. <i>Biological Trace Element Research</i> , 172(2), 299–306. <a href="https://doi.org/10.1007/s12011-015-0601-3">https://doi.org/10.1007/s12011-015-0601-3</a>                                                                                                                                                                                                                                              |
| 664537014        | Alghadir, A. H., Gabr, S. A., & Iqbal, Z. A. (2015). Effects of sitting time associated with media consumption on physical activity patterns and daily energy expenditure of Saudi school students. <i>Journal of Physical Therapy Science</i> , 27(9), 2807–2812. <a href="https://doi.org/10.1589/jpts.27.2807">https://doi.org/10.1589/jpts.27.2807</a>                                                                                                                                                                                                                   |
| 664536995        | Alghadir, A. H., Gabr, S. A., & Rizk, A. A. (2018). Physical Fitness, Adiposity, and Diets as Surrogate Measures of Bone Health in Schoolchildren: A Biochemical and Cross-Sectional Survey Analysis. <i>Journal of Clinical Densitometry: The Official Journal of the International Society for Clinical Densitometry</i> , 21(3), 406–419. <a href="https://doi.org/10.1016/j.jocd.2017.12.006">https://doi.org/10.1016/j.jocd.2017.12.006</a>                                                                                                                             |



|           |                                                                                                                                                                                                                                                                                                                                                                                                                                                                                        |
|-----------|----------------------------------------------------------------------------------------------------------------------------------------------------------------------------------------------------------------------------------------------------------------------------------------------------------------------------------------------------------------------------------------------------------------------------------------------------------------------------------------|
| 664535513 | Alghadir, A. H., Iqbal, Z. A., & Gabr, S. A. (2020). Differences among Saudi and Expatriate Students: Body Composition Indices, Sitting Time Associated with Media Use and Physical Activity Pattern. <i>International Journal of Environmental Research and Public Health</i> , 17(3), 832. <a href="https://doi.org/10.3390/ijerph17030832">https://doi.org/10.3390/ijerph17030832</a>                                                                                               |
| 664534802 | Al-Ghamdi, M. A., Lanham-New, S. A., & Kahn, J. A. (2012). Differences in vitamin D status and calcium metabolism in Saudi Arabian boys and girls aged 6 to 18 years: Effects of age, gender, extent of veiling and physical activity with concomitant implications for bone health. <i>Public Health Nutrition</i> , 15(10), 1845–1853. <a href="https://doi.org/10.1017/S1368980011003612">https://doi.org/10.1017/S1368980011003612</a>                                             |
| 664537409 | Al-Hazzaa, H. M. (2007). Pedometer-determined physical activity among obese and non-obese 8- to 12-year-old Saudi schoolboys. <i>Journal of Physiological Anthropology</i> , 26(4), 459–465. <a href="https://doi.org/10.2114/jpa2.26.459">https://doi.org/10.2114/jpa2.26.459</a>                                                                                                                                                                                                     |
| 664534660 | Al-Hazzaa, H. M., Abahussain, N. A., Al-Sobayel, H. I., Qahwaji, D. M., & Musaiger, A. O. (2011). Physical activity, sedentary behaviors and dietary habits among Saudi adolescents relative to age, gender and region. <i>The International Journal of Behavioral Nutrition and Physical Activity</i> , 8, 140. <a href="https://doi.org/10.1186/1479-5868-8-140">https://doi.org/10.1186/1479-5868-8-140</a>                                                                         |
| 664535280 | Al-Hazzaa, H. M., Abahussain, N. A., Al-Sobayel, H. I., Qahwaji, D. M., & Musaiger, A. O. (2012). Lifestyle factors associated with overweight and obesity among Saudi adolescents. <i>BMC Public Health</i> , 12, 354. <a href="https://doi.org/10.1186/1471-2458-12-354">https://doi.org/10.1186/1471-2458-12-354</a>                                                                                                                                                                |
| 664536834 | Al-Hazzaa, H. M., Alahmadi, M. A., Al-Sobayel, H. I., Abahussain, N. A., Qahwaji, D. M., & Musaiger, A. O. (2014). Patterns and determinants of physical activity among Saudi adolescents. <i>Journal of Physical Activity &amp; Health</i> , 11(6), 1202–1211. <a href="https://doi.org/10.1123/jpah.2012-0427">https://doi.org/10.1123/jpah.2012-0427</a>                                                                                                                            |
| 664536594 | Al-Hazzaa, H. M., Alhussain, M. H., Alhowikan, A. M., & Obeid, O. A. (2019). Insufficient Sleep Duration And Its Association With Breakfast Intake, Overweight/Obesity, Socio-Demographics And Selected Lifestyle Behaviors Among Saudi School Children. <i>Nature and Science of Sleep</i> , 11, 253–263. <a href="https://doi.org/10.2147/NSS.S225883">https://doi.org/10.2147/NSS.S225883</a>                                                                                       |
| 664536887 | Al-Hazzaa, H. M., Al-Nakeeb, Y., Duncan, M. J., Al-Sobayel, H. I., Abahussain, N. A., Musaiger, A. O., Lyons, M., Collins, P., & Nevill, A. (2013). A cross-cultural comparison of health behaviors between Saudi and British adolescents living in urban areas: Gender by country analyses. <i>International Journal of Environmental Research and Public Health</i> , 10(12), 6701–6720. <a href="https://doi.org/10.3390/ijerph10126701">https://doi.org/10.3390/ijerph10126701</a> |
| 664537247 | Al-Hazzaa, H. M., & Al-Rasheedi, A. A. (2007). Adiposity and physical activity levels among preschool children in Jeddah, Saudi Arabia. <i>Saudi Medical Journal</i> , 28(5), 766–773.                                                                                                                                                                                                                                                                                                 |
| 664538147 | Al-Hazzaa, H. M., Al-Sobayel, H. I., Abahussain, N. A., Qahwaji, D. M., Alahmadi, M. A., & Musaiger, A. O. (2014). Association of dietary habits with levels of physical activity and screen time among adolescents living in Saudi Arabia. <i>Journal of Human Nutrition and Dietetics: The Official Journal of the British Dietetic Association</i> , 27 Suppl 2, 204–213. <a href="https://doi.org/10.1111/jhn.12147">https://doi.org/10.1111/jhn.12147</a>                         |
| 664537553 | Al-Hazzaa, H. M., Al-Sobayel, H. I., & Musaiger, A. O. (2011). Convergent validity of the Arab Teens Lifestyle Study (ATLS) physical activity questionnaire. <i>International Journal of Environmental Research and Public Health</i> , 8(9), 3810–3820. <a href="https://doi.org/10.3390/ijerph8093810">https://doi.org/10.3390/ijerph8093810</a>                                                                                                                                     |
| 664534427 | Al-Hazzaa, H. M., Musaiger, A. O., Abahussain, N. A., Al-Sobayel, H. I., & Qahwaji, D. M. (2014). Lifestyle correlates of self-reported sleep duration among Saudi adolescents: A multicentre school-based cross-sectional study. <i>Child: Care, Health and Development</i> , 40(4), 533–542. <a href="https://doi.org/10.1111/cch.12051">https://doi.org/10.1111/cch.12051</a>                                                                                                       |
| 664536186 | Alhusaini, A. A., Ali Al-Walah, M., Melam, G. R., & Buragadda, S. (2017). Pedometer-determined physical activity levels of healthy children and children with Down's syndrome. <i>Somatosensory &amp; Motor Research</i> , 34(4), 219–225. <a href="https://doi.org/10.1080/08990220.2017.1415880">https://doi.org/10.1080/08990220.2017.1415880</a>                                                                                                                                   |
| 664535406 | Alhusaini, A. A., Buragadda, S., & Melam, G. (2020). Associations among Body Mass Index, sedentary behavior, physical activity, and academic performance in schoolchildren. <i>The Journal of Sports Medicine and Physical Fitness</i> , 60(12), 1551–1557. <a href="https://doi.org/10.23736/S0022-4707.20.10482-1">https://doi.org/10.23736/S0022-4707.20.10482-1</a>                                                                                                                |
| 664535412 | Alhusaini, A. A., Melam, G. R., & Buragadda, S. (2020). Cross-Cultural Variation in BMI, Sedentary Behavior, and Physical Activity in International School Girls Residing in Saudi Arabia. <i>International Journal of Environmental Research and Public Health</i> , 17(6), 2057. <a href="https://doi.org/10.3390/ijerph17062057">https://doi.org/10.3390/ijerph17062057</a>                                                                                                         |
| 664535430 | Aliss, E. M., Sutaih, R. H., Kamfar, H. Z., Alagha, A. E., & Marzouki, Z. M. (2020). Physical activity pattern and its relationship with overweight and obesity in saudi children. <i>International Journal of Pediatrics &amp; Adolescent Medicine</i> , 7(4), 181–185. <a href="https://doi.org/10.1016/j.ijpam.2020.03.007">https://doi.org/10.1016/j.ijpam.2020.03.007</a>                                                                                                         |



|           |                                                                                                                                                                                                                                                                                                                                                                                                                                                                              |
|-----------|------------------------------------------------------------------------------------------------------------------------------------------------------------------------------------------------------------------------------------------------------------------------------------------------------------------------------------------------------------------------------------------------------------------------------------------------------------------------------|
| 664535680 | Aljuhani, O., & Sandercock, G. (2019). Contribution of Physical Education to the Daily Physical Activity of Schoolchildren in Saudi Arabia. <i>International Journal of Environmental Research and Public Health</i> , 16(13), 2397. <a href="https://doi.org/10.3390/ijerph16132397">https://doi.org/10.3390/ijerph16132397</a>                                                                                                                                             |
| 664534402 | Al-Kutbe, R., Payne, A., de Looy, A., & Rees, G. A. (2017). A comparison of nutritional intake and daily physical activity of girls aged 8-11 years old in Makkah, Saudi Arabia according to weight status. <i>BMC Public Health</i> , 17(1), 592. <a href="https://doi.org/10.1186/s12889-017-4506-2">https://doi.org/10.1186/s12889-017-4506-2</a>                                                                                                                         |
| 664534486 | Allafi, A., Al-Haifi, A. R., Al-Fayez, M. A., Al-Athari, B. I., Al-Ajmi, F. A., Al-Hazzaa, H. M., Musaiger, A. O., & Ahmed, F. (2014). Physical activity, sedentary behaviours and dietary habits among Kuwaiti adolescents: Gender differences. <i>Public Health Nutrition</i> , 17(9), 2045–2052. <a href="https://doi.org/10.1017/S1368980013002218">https://doi.org/10.1017/S1368980013002218</a>                                                                        |
| 664536870 | Al-Nakeeb, Y., Lyons, M., Collins, P., Al-Nuaim, A., Al-Hazzaa, H., Duncan, M. J., & Nevill, A. (2012). Obesity, physical activity and sedentary behavior amongst British and Saudi youth: A cross-cultural study. <i>International Journal of Environmental Research and Public Health</i> , 9(4), 1490–1506. <a href="https://doi.org/10.3390/ijerph9041490">https://doi.org/10.3390/ijerph9041490</a>                                                                     |
| 664536892 | Al-Nuaim, A. A., Al-Nakeeb, Y., Lyons, M., Al-Hazzaa, H. M., Nevill, A., Collins, P., & Duncan, M. J. (2012). The Prevalence of Physical Activity and Sedentary Behaviours Relative to Obesity among Adolescents from Al-Ahsa, Saudi Arabia: Rural versus Urban Variations. <i>Journal of Nutrition and Metabolism</i> , 2012, 417589. <a href="https://doi.org/10.1155/2012/417589">https://doi.org/10.1155/2012/417589</a>                                                 |
| 664536797 | Al-Sobayel, H., Al-Hazzaa, H. M., Abahussain, N. A., Qahwaji, D. M., & Musaiger, A. O. (2015). Gender differences in leisure-time versus non-leisure-time physical activity among Saudi adolescents. <i>Annals of Agricultural and Environmental Medicine: AAEM</i> , 22(2), 344–348. <a href="https://doi.org/10.5604/12321966.1152091">https://doi.org/10.5604/12321966.1152091</a>                                                                                        |
| 664540156 | Altıntaş, A., & Aşçi, F. H. (2008). Physical self-esteem of adolescents with regard to physical activity and pubertal status. <i>Pediatric Exercise Science</i> , 20(2), 142–156. <a href="https://doi.org/10.1123/pes.20.2.142">https://doi.org/10.1123/pes.20.2.142</a>                                                                                                                                                                                                    |
| 664540175 | Altıntaş, A., Aşçi, F. H., Kin-İşler, A., Güven-Karahan, B., Kelecsek, S., Özkan, A., Yılmaz, A., & Kara, F. M. (2014). The role of physical activity, body mass index and maturity status in body-related perceptions and self-esteem of adolescents. <i>Annals of Human Biology</i> , 41(5), 395–402. <a href="https://doi.org/10.3109/03014460.2013.857721">https://doi.org/10.3109/03014460.2013.857721</a>                                                              |
| 664534680 | Amini, M., Djazayery, A., Majdzadeh, R., Taghdisi, M.-H., Sadrzadeh-Yeganeh, H., Abdollahi, Z., Hosseinpour-Niazi, N., Chamari, M., & Nourmohammadi, M. (2016). A School-Based Intervention to Reduce Excess Weight in Overweight and Obese Primary School Students. <i>Biological Research for Nursing</i> , 18(5), 531–540. <a href="https://doi.org/10.1177/1099800416654261">https://doi.org/10.1177/1099800416654261</a>                                                |
| 664534882 | Amiri, P., Jalali-Farahani, S., Zarkesh, M., Barzin, M., Kaviani, R., & Ahmadizad, S. (2014). Reliability and validity of the Iranian version of the QAPACE in adolescents. <i>Quality of Life Research: An International Journal of Quality of Life Aspects of Treatment, Care and Rehabilitation</i> , 23(6), 1797–1802. <a href="https://doi.org/10.1007/s11136-014-0625-8">https://doi.org/10.1007/s11136-014-0625-8</a>                                                 |
| 664534557 | Ardestani, M., Niknami, S., Hidarnia, A., & Hajizadeh, E. (2015). Predictors of Physical Activity among Adolescent Girl Students Based on the Social Cognitive Theory. <i>Journal of Research in Health Sciences</i> , 15(4), 223–227.                                                                                                                                                                                                                                       |
| 664534625 | Ardestani, M. S., Niknami, S., Hidarnia, A., & Hajizadeh, E. (2016). Psychometric properties of the Social Cognitive Theory questionnaire for physical activity in a sample of Iranian adolescent girl students. <i>Eastern Mediterranean Health Journal = La Revue De Sante De La Mediterranee Orientale = Al-Majallah Al-Sihhiyah Li-Sharq Al-Mutawassit</i> , 22(5), 318–326. <a href="https://doi.org/10.26719/2016.22.5.318">https://doi.org/10.26719/2016.22.5.318</a> |
| 664534611 | Ardic, A., & Erdogan, S. (2017). The effectiveness of the COPE healthy lifestyles TEEN program: A school-based intervention in middle school adolescents with 12-month follow-up. <i>Journal of Advanced Nursing</i> , 73(6), 1377–1389. <a href="https://doi.org/10.1111/jan.13217">https://doi.org/10.1111/jan.13217</a>                                                                                                                                                   |
| 664534201 | Aviram, R., Harries, N., Shkedy Rabani, A., Amro, A., Nammourah, I., Al-Jarrah, M., Raanan, Y., Hutzler, Y., & Bar-Haim, S. (2019). Comparison of Habitual Physical Activity and Sedentary Behavior in Adolescents and Young Adults With and Without Cerebral Palsy. <i>Pediatric Exercise Science</i> , 31(1), 60–66. <a href="https://doi.org/10.1123/pes.2017-0285">https://doi.org/10.1123/pes.2017-0285</a>                                                             |
| 664534237 | Azabdaftari, F., Jafarpour, P., Asghari-Jafarabadi, M., Shokrvash, B., & Reyhani, P. (2020). Unrestricted prevalence of sedentary behaviors from early childhood. <i>BMC Public Health</i> , 20(1), 255. <a href="https://doi.org/10.1186/s12889-020-8346-0">https://doi.org/10.1186/s12889-020-8346-0</a>                                                                                                                                                                   |
| 664538415 | Azadbakht, L., Akbari, F., Qorbani, M., Esmail Motlagh, M., Ardalan, G., Heshmat, R., Daneshzad, E., & Kelishadi, R. (2019). Dinner consumption and cardiovascular disease risk factors among a nationally representative sample of Iranian adolescents: The CASPIAN-III Study. <i>Journal of Cardiovascular and Thoracic Research</i> , 11(2), 138–146. <a href="https://doi.org/10.15171/jcvtr.2019.24">https://doi.org/10.15171/jcvtr.2019.24</a>                         |



|           |                                                                                                                                                                                                                                                                                                                                                                                                                                                                        |
|-----------|------------------------------------------------------------------------------------------------------------------------------------------------------------------------------------------------------------------------------------------------------------------------------------------------------------------------------------------------------------------------------------------------------------------------------------------------------------------------|
| 664534457 | Bagherniya, M., Mostafavi Darani, F., Sharma, M., Maracy, M. R., Allipour Birgani, R., Ranjbar, G., Taghipour, A., Safraian, M., & Keshavarz, S. A. (2018). Assessment of the Efficacy of Physical Activity Level and Lifestyle Behavior Interventions Applying Social Cognitive Theory for Overweight and Obese Girl Adolescents. <i>Journal of Research in Health Sciences</i> , 18(2), e00409.                                                                      |
| 664534571 | Bagherniya, M., Sharma, M., Mostafavi, F., & Keshavarz, S. A. (2015). Application of social cognitive theory in predicting childhood obesity prevention behaviors in overweight and obese Iranian adolescents. <i>International Quarterly of Community Health Education</i> , 35(2), 133–147. <a href="https://doi.org/10.1177/0272684X15569487">https://doi.org/10.1177/0272684X15569487</a>                                                                          |
| 664539762 | Baradaran Mahdavi, S., Bolourinejad, P., Heshmat, R., Motlagh, M. E., Ziaodini, H., Taheri, M., Ahadi, Z., Qorbani, M., & Kelishadi, R. (2019). Association of sedentary leisure time with school performance in children and adolescents: The CASPIAN-V study. <i>International Journal of Pediatrics, Online First</i> . <a href="https://doi.org/10.22038/ijp.2019.38757.3313">https://doi.org/10.22038/ijp.2019.38757.3313</a>                                     |
| 664534254 | Baradaran Mahdavi, S., Mansourian, M., Shams, E., Qorbani, M., Heshmat, R., Motlagh, M. E., Ziaodini, H., Dashti, R., Taheri, M., & Kelishadi, R. (2020). Association of Sunlight Exposure with Sleep Hours in Iranian Children and Adolescents: The CASPIAN-V Study. <i>Journal of Tropical Pediatrics</i> , 66(1), 4–14. <a href="https://doi.org/10.1093/tropej/fmz023">https://doi.org/10.1093/tropej/fmz023</a>                                                   |
| 664537420 | Bathrellou, E., Lazarou, C., Panagiotakos, D. B., & Sidossis, L. S. (2007). Physical activity patterns and sedentary behaviors of children from urban and rural areas of Cyprus. <i>Central European Journal of Public Health</i> , 15(2), 66–70. <a href="https://doi.org/10.21101/cejph.a3414">https://doi.org/10.21101/cejph.a3414</a>                                                                                                                              |
| 664535342 | Baygi, F., Dorosty, A. R., Kelishadi, R., Qorbani, M., Asayesh, H., Mansourian, M., & Mirkarimi, K. (2012). Determinants of childhood obesity in representative sample of children in north East of iran. <i>Cholesterol</i> , 2012, 875163. <a href="https://doi.org/10.1155/2012/875163">https://doi.org/10.1155/2012/875163</a>                                                                                                                                     |
| 664534490 | Baygi, F., Heshmat, R., Kelishadi, R., Mohammadi, F., Motlagh, M. E., Ardalan, G., Asayesh, H., Larijani, B., & Qorbani, M. (2015). Regional Disparities in Sedentary Behaviors and Meal Frequency in Iranian Adolescents: The CASPIAN-III Study. <i>Iranian Journal of Pediatrics</i> , 25(2), e182. <a href="https://doi.org/10.5812/ijp.182">https://doi.org/10.5812/ijp.182</a>                                                                                    |
| 664538115 | Bicer, A. H., & Alsaffar, A. A. (2016). Dietary intake and physical activity levels of male adolescents with autism spectrum disorder (ASD) and normal to high body mass index (BMI) – A case series study. <i>Research in Autism Spectrum Disorders</i> , 31, 1–10. <a href="https://doi.org/10.1016/j.rasd.2016.07.002">https://doi.org/10.1016/j.rasd.2016.07.002</a>                                                                                               |
| 664810340 | Bucksch, J., Sigmundova, D., Hamrik, Z., Troped, P. J., Melkevik, O., Ahluwalia, N., Borraccino, A., Tynjälä, J., Kalman, M., & Inchley, J. (2016). International Trends in Adolescent Screen-Time Behaviors From 2002 to 2010. <i>The Journal of Adolescent Health: Official Publication of the Society for Adolescent Medicine</i> , 58(4), 417–425. <a href="https://doi.org/10.1016/j.jadohealth.2015.11.014">https://doi.org/10.1016/j.jadohealth.2015.11.014</a> |
| 664539181 | Camliguney, A. F., Mengutay, S., & Pehlivan, A. (2012). Differences in Physical Activity Levels in 8-10 Year-old Girls Who Attend Physical Education Classes Only and Those Who Also Regularly Perform Extracurricular Sports Activities. <i>Procedia - Social and Behavioral Sciences</i> , 46, 4708–4712. <a href="https://doi.org/10.1016/j.sbspro.2012.06.323">https://doi.org/10.1016/j.sbspro.2012.06.323</a>                                                    |
| 664537436 | Cengiz, C., & Ince, M. L. (2014). Impact of social-ecologic intervention on physical activity knowledge and behaviors of rural students. <i>Journal of Physical Activity &amp; Health</i> , 11(8), 1565–1572. <a href="https://doi.org/10.1123/jpah.2013-0080">https://doi.org/10.1123/jpah.2013-0080</a>                                                                                                                                                              |
| 664810456 | Cermak, S. A., Katz, N., Weintraub, N., Steinhart, S., Raz-Silbiger, S., Munoz, M., & Lifshitz, N. (2015). Participation in Physical Activity, Fitness, and Risk for Obesity in Children with Developmental Coordination Disorder: A Cross-cultural Study. <i>Occupational Therapy International</i> , 22(4), 163–173. <a href="https://doi.org/10.1002/oti.1393">https://doi.org/10.1002/oti.1393</a>                                                                 |
| 664537346 | Chacar, H. R., & Salameh, P. (2011). Public schools adolescents' obesity and growth curves in Lebanon. <i>Le Journal Medical Libanais. The Lebanese Medical Journal</i> , 59(2), 80–88.                                                                                                                                                                                                                                                                                |
| 664539248 | Dagci, G., & Saygin, Ö. (2015). Investigation of Physical Activity Levels and Body Compositions of Adolescent Boys and Girls. <i>Studies on Ethno-Medicine</i> , 9(3), 385–390. <a href="https://doi.org/10.1080/09735070.2015.11905456">https://doi.org/10.1080/09735070.2015.11905456</a>                                                                                                                                                                            |
| 664540105 | Daşkapan, A., Şanlı, C., Aydoğan-Arslan, S., Çiledağ-Özdemir, F., Korkem, D., & Kara, U. (2017). Evaluation of the functional capacity, respiratory functions and musculoskeletal systems of the children with chest pain for non-cardiac reasons. <i>The Turkish Journal of Pediatrics</i> , 59(3), 295–303. <a href="https://doi.org/10.24953/turkijped.2017.03.010">https://doi.org/10.24953/turkijped.2017.03.010</a>                                              |
| 664537117 | Davidsson, L., Al-Ghanim, J., Al-Ati, T., Al-Hamad, N., Al-Mutairi, A., Al-Olayan, L., & Preston, T. (2016). Total Energy Expenditure in Obese Kuwaiti Primary School Children Assessed by the Doubly-Labeled Water Technique. <i>International Journal of Environmental Research and Public Health</i> , 13(10), 1007. <a href="https://doi.org/10.3390/ijerph13101007">https://doi.org/10.3390/ijerph13101007</a>                                                    |



|           |                                                                                                                                                                                                                                                                                                                                                                                                                                                                                                                                                                                                                                            |
|-----------|--------------------------------------------------------------------------------------------------------------------------------------------------------------------------------------------------------------------------------------------------------------------------------------------------------------------------------------------------------------------------------------------------------------------------------------------------------------------------------------------------------------------------------------------------------------------------------------------------------------------------------------------|
| 664537297 | De Bourdeaudhuij, I., Verbestel, V., De Henauw, S., Maes, L., Huybrechts, I., Mårild, S., Eiben, G., Moreno, L. A., Barba, G., Kovács, É., Konstabel, K., Tornaritis, M., Gallois, K., Hebestreit, A., Pigeot, I., & IDEFICS consortium. (2015). Behavioural effects of a community-oriented setting-based intervention for prevention of childhood obesity in eight European countries. Main results from the IDEFICS study. <i>Obesity Reviews: An Official Journal of the International Association for the Study of Obesity</i> , 16 Suppl 2, 30–40. <a href="https://doi.org/10.1111/obr.12347">https://doi.org/10.1111/obr.12347</a> |
| 664534506 | Dianat, I., Alipour, A., & Asghari Jafarabadi, M. (2017). Prevalence and risk factors of low back pain among school age children in Iran. <i>Health Promotion Perspectives</i> , 7(4), 223–229. <a href="https://doi.org/10.15171/hpp.2017.39">https://doi.org/10.15171/hpp.2017.39</a>                                                                                                                                                                                                                                                                                                                                                    |
| 664539454 | Didarlo, A., Sharafkhani, N., Shahnazi, H., Sorkhabi, Z., & sheikhi, S. (2017). Application of Theory of Planned Behavior to improve Obesity-Preventive Lifestyle among Students: A school-based interventional study. <i>International Journal of Pediatrics, Online First</i> . <a href="https://doi.org/10.22038/ijp.2017.24040.2044">https://doi.org/10.22038/ijp.2017.24040.2044</a>                                                                                                                                                                                                                                                  |
| 664536608 | Doaei, S., Jarrahi, S., Torki, S., Haghshenas, R., Jamshidi, Z., Rezaei, S., Moslem, A., Ghorat, F., Khodabakhshi, A., & Gholamalizadeh, M. (2020). Serum vitamin D level may be associated with body weight and body composition in male adolescents; a longitudinal study. <i>Pediatric Endocrinology, Diabetes, and Metabolism</i> , 26(3), 125–131. <a href="https://doi.org/10.5114/pedm.2020.97466">https://doi.org/10.5114/pedm.2020.97466</a>                                                                                                                                                                                      |
| 664540235 | Doğan, M., Derman, O., Oksüz-Kanbur, N., Akgül, S., & Kutluk, T. (2009). The effects of nutrition and physical activity on bone development in male adolescents. <i>The Turkish Journal of Pediatrics</i> , 51(6), 545–550.                                                                                                                                                                                                                                                                                                                                                                                                                |
| 664537107 | Duncan, M. J., Al-Hazza, H. M., Al-Nakeeb, Y., Al-Sobayel, H. I., Abahussain, N. A., Musaiger, A. O., Lyons, M., Collins, P., & Nevill, A. (2014). Anthropometric and lifestyle characteristics of active and inactive Saudi and British adolescents. <i>American Journal of Human Biology: The Official Journal of the Human Biology Council</i> , 26(5), 635–642. <a href="https://doi.org/10.1002/ajhb.22574">https://doi.org/10.1002/ajhb.22574</a>                                                                                                                                                                                    |
| 664534171 | Edalati, S., Bagherzadeh, F., Asghari Jafarabadi, M., & Ebrahimi-Mamaghani, M. (2021). Higher ultra-processed food intake is associated with higher DNA damage in healthy adolescents. <i>The British Journal of Nutrition</i> , 125(5), 568–576. <a href="https://doi.org/10.1017/S0007114520001981">https://doi.org/10.1017/S0007114520001981</a>                                                                                                                                                                                                                                                                                        |
| 664535969 | Ejtahed, H.-S., Mahmoodi, Z., Qorbani, M., Angoorani, P., Motlagh, M. E., Hasani-Ranjbar, S., Ziaodini, H., Taheri, M., Heshmat, R., & Kelishadi, R. (2021). A comparison between body mass index and waist circumference for identifying continuous metabolic syndrome risk score components in Iranian school-aged children using a structural equation modeling approach: The CASPIAN-V study. <i>Eating and Weight Disorders: EWD</i> , 26(5), 1609–1616. <a href="https://doi.org/10.1007/s40519-020-00971-y">https://doi.org/10.1007/s40519-020-00971-y</a>                                                                          |
| 664534586 | Eliacik, K., Bolat, N., Koçyiğit, C., Kanik, A., Selkie, E., Yilmaz, H., Catli, G., Dundar, N. O., & Dundar, B. N. (2016). Internet addiction, sleep and health-related life quality among obese individuals: A comparison study of the growing problems in adolescent health. <i>Eating and Weight Disorders: EWD</i> , 21(4), 709–717. <a href="https://doi.org/10.1007/s40519-016-0327-z">https://doi.org/10.1007/s40519-016-0327-z</a>                                                                                                                                                                                                 |
| 664539209 | Elkholy, T., Hassanen, N. H. M., & Rasha. (2012). Demographic, Socio-Economic Factors and Physical Activity Affecting the Nutritional Status of Young Children Under Five Years. <i>Life Science Journal</i> , 9, 3604–3614.                                                                                                                                                                                                                                                                                                                                                                                                               |
| 664539071 | Erturan, G., McBride, R., & Agbuga, B. (2020). Self-regulation and self-efficacy as mediators of achievement goals and leisure time physical activity: A proposed model. <i>Pedagogy of Physical Culture and Sports</i> , 24(1), 12–20. <a href="https://doi.org/10.15561/26649837.2020.0102">https://doi.org/10.15561/26649837.2020.0102</a>                                                                                                                                                                                                                                                                                              |
| 664534458 | Esatbeyoğlu, F., & KiN İşler, A. (2018). Physical Activity Levels, BMI and Healthy Life Style Behaviors in Adolescents Living in a Rural District. <i>Türkiye Klinikleri Journal of Sports Sciences</i> , 10(1), 9–18. <a href="https://doi.org/10.5336/sportsci.2017-57533">https://doi.org/10.5336/sportsci.2017-57533</a>                                                                                                                                                                                                                                                                                                               |
| 664540012 | Esmailzadeh, S., & Ebadollahzadeh, K. (2012). Physical fitness, physical activity and sedentary activities of 7 to 11 year old boys with different body mass indexes. <i>Asian Journal of Sports Medicine</i> , 3(2), 105–112. <a href="https://doi.org/10.5812/asjism.34709">https://doi.org/10.5812/asjism.34709</a>                                                                                                                                                                                                                                                                                                                     |
| 664534238 | Faridizad, R., Ahadi, Z., Heshmat, R., Motlagh, M. E., Sheidaei, A., Ziaodini, H., Taheri, M., Qorbani, M., Baradaran Mahdavi, S., & Kelishadi, R. (2020). Association of screen time with subjective health complaints in Iranian school-aged children and adolescents: The CASPIAN-V study. <i>Journal of Public Health</i> , 28(1), 31–40. <a href="https://doi.org/10.1007/s10389-019-01014-2">https://doi.org/10.1007/s10389-019-01014-2</a>                                                                                                                                                                                          |
| 664534839 | Fazah, A., Jacob, C., Moussa, E., El-Hage, R., Youssef, H., & Delamarche, P. (2010). Activity, inactivity and quality of life among Lebanese adolescents. <i>Pediatrics International: Official Journal of the Japan Pediatric Society</i> , 52(4), 573–578. <a href="https://doi.org/10.1111/j.1442-200X.2009.03021.x">https://doi.org/10.1111/j.1442-200X.2009.03021.x</a>                                                                                                                                                                                                                                                               |
| 664534165 | Gencer-Atalay, K., Karadag-Saygi, E., Uzuncakmak, B., Keskin, A., Furtun, Y., Guven, H., Uzunoglu, I., & Kurtel, H. (2021). Daily Physical Activity in Children and Adolescents with Low                                                                                                                                                                                                                                                                                                                                                                                                                                                   |



|           |                                                                                                                                                                                                                                                                                                                                                                                                                                                         |
|-----------|---------------------------------------------------------------------------------------------------------------------------------------------------------------------------------------------------------------------------------------------------------------------------------------------------------------------------------------------------------------------------------------------------------------------------------------------------------|
|           | Lumbar and Sacral Level Myelomeningocele. <i>Developmental Neurorehabilitation</i> , 24(3), 145–149. <a href="https://doi.org/10.1080/17518423.2020.1800855">https://doi.org/10.1080/17518423.2020.1800855</a>                                                                                                                                                                                                                                          |
| 664534820 | Ghavamzadeh, S., Khalkhali, H. R., & Alizadeh, M. (2013). TV viewing, independent of physical activity and obesogenic foods, increases overweight and obesity in adolescents. <i>Journal of Health, Population, and Nutrition</i> , 31(3), 334–342. <a href="https://doi.org/10.3329/jhpn.v31i3.16825">https://doi.org/10.3329/jhpn.v31i3.16825</a>                                                                                                     |
| 664536907 | Ghobadi, S., & Faghih, S. (2018). Eating breakfast and snacks while television viewing are associated with some cardio metabolic risk factors among Iranian children. <i>Diabetes &amp; Metabolic Syndrome</i> , 12(3), 235–243. <a href="https://doi.org/10.1016/j.dsx.2017.09.008">https://doi.org/10.1016/j.dsx.2017.09.008</a>                                                                                                                      |
| 664534538 | Ghobadi, S., Rostami, Z. H., Marzijarani, M. S., & Faghih, S. (2019). Association of Vitamin D Status and Metabolic Syndrome Components in Iranian Children. <i>International Journal of Preventive Medicine</i> , 10, 77. <a href="https://doi.org/10.4103/ijpvm.IJPVM_242_17">https://doi.org/10.4103/ijpvm.IJPVM_242_17</a>                                                                                                                          |
| 664536789 | Ghobadi, S., Totosty de Zepetnek, J. O., Hemmatdar, Z., Bellissimo, N., Barati, R., Ahmadnia, H., Salehi-Marzijarani, M., & Faghih, S. (2018). Association between overweight/obesity and eating habits while watching television among primary-school children in the city of Shiraz, Iran. <i>Public Health Nutrition</i> , 21(3), 571–579. <a href="https://doi.org/10.1017/S1368980017003251">https://doi.org/10.1017/S1368980017003251</a>         |
| 664540225 | Güvenç, A., Açıkada, C., Aslan, A., & Ozer, K. (2011). Daily Physical Activity and Physical Fitness in 11-to 15-year-old Trained and Untrained Turkish Boys. <i>Journal of Sports Science &amp; Medicine</i> , 10(3), 502–514.                                                                                                                                                                                                                          |
| 664540123 | Güvenç, A., Aslan, A., & Açıkada, C. (2013). Objectively measured activity in 8-10-year-old Turkish children: Relationship to health-related fitness. <i>Pediatrics International: Official Journal of the Japan Pediatric Society</i> , 55(5), 629–636. <a href="https://doi.org/10.1111/ped.12119">https://doi.org/10.1111/ped.12119</a>                                                                                                              |
| 664539070 | Haghparast, A.; Rohani, C.; Vasli, P.; Salmani, F.; Marzaleh, M. A. (2020). The Effect of two educational methods of lecturing and peer group on physical activity among 12-15-year-old students in health promoting schools. <i>Iranian Red Crescent Medical Journal</i> . <a href="https://doi.org/10.32592/ircmj.2020.22.9.59">https://doi.org/10.32592/ircmj.2020.22.9.59</a>                                                                       |
| 664534793 | Hajian-Tilaki, K., & Heidari, B. (2012). Prevalences of overweight and obesity and their association with physical activity pattern among Iranian adolescents aged 12-17 years. <i>Public Health Nutrition</i> , 15(12), 2246–2252. <a href="https://doi.org/10.1017/S1368980012001048">https://doi.org/10.1017/S1368980012001048</a>                                                                                                                   |
| 664540034 | Hajian-Tilaki, K., & Heidari, B. (2013). Childhood Obesity, Overweight, Socio-Demographic and Life Style Determinants among Preschool Children in Babol, Northern Iran. <i>Iranian Journal of Public Health</i> , 42(11), 1283–1291.                                                                                                                                                                                                                    |
| 664535051 | Hamaideh, S. H., Al-Khateeb, R. Y., & Al-Rawashdeh, A. B. (2010). Overweight and obesity and their correlates among Jordanian adolescents. <i>Journal of Nursing Scholarship: An Official Publication of Sigma Theta Tau International Honor Society of Nursing</i> , 42(4), 387–394. <a href="https://doi.org/10.1111/j.1547-5069.2010.01367.x">https://doi.org/10.1111/j.1547-5069.2010.01367.x</a>                                                   |
| 664536282 | Hashem, R., Rey-López, J. P., Hamer, M., McMunn, A., Whincup, P. H., Owen, C. G., Rowlands, A., & Stamatakis, E. (2018). Physical Activity and Sedentary Behaviors Levels of Kuwaiti Adolescents: The Study of Health and Activity Among Adolescents in Kuwait. <i>Journal of Physical Activity &amp; Health</i> , 15(4), 255–262. <a href="https://doi.org/10.1123/jpah.2017-0013">https://doi.org/10.1123/jpah.2017-0013</a>                          |
| 664536181 | Hashem, R., Rey-López, J. P., Hamer, M., McMunn, A., Rowlands, A., Whincup, P. H., Owen, C. G., Ding, D., Powell, L., & Stamatakis, E. (2019). Associations between objectively assessed and questionnaire-based sedentary behaviour with body mass index and systolic blood pressure in Kuwaiti adolescents. <i>BMC Research Notes</i> , 12(1), 588. <a href="https://doi.org/10.1186/s13104-019-4626-0">https://doi.org/10.1186/s13104-019-4626-0</a> |
| 664537990 | Hassan, M. O., & Al-Kharusy, W. (2000). Physical fitness and fatness among Omani schoolboys: A pilot study. <i>Journal for Scientific Research. Medical Sciences</i> , 2(1), 37–41.                                                                                                                                                                                                                                                                     |
| 664538353 | Hawi, N. S., & Rupert, M. S. (2015). Impact of e-Discipline on Children's Screen Time. <i>Cyberpsychology, Behavior and Social Networking</i> , 18(6), 337–342. <a href="https://doi.org/10.1089/cyber.2014.0608">https://doi.org/10.1089/cyber.2014.0608</a>                                                                                                                                                                                           |
| 664537091 | Henry, C. J. K., Lightowler, H. J., & Al-Hourani, H. M. (2004). Physical activity and levels of inactivity in adolescent females ages 11-16 years in the United Arab Emirates. <i>American Journal of Human Biology: The Official Journal of the Human Biology Council</i> , 16(3), 346–353. <a href="https://doi.org/10.1002/ajhb.20022">https://doi.org/10.1002/ajhb.20022</a>                                                                        |
| 664536952 | Hovsepian, S., Kelishadi, R., Motlagh, M. E., Kasaeian, A., Shafiee, G., Arefirad, T., Najafi, F., Khoramdad, M., Asayesh, H., Heshmat, R., & Qorbani, M. (2016). Level of physical activity and screen time among Iranian children and adolescents at the national and provincial level: The CASPIAN-IV study. <i>Medical Journal of the Islamic Republic of Iran</i> , 30, 422.                                                                       |
| 664534507 | Jalali-Farahani, S., Amiri, P., & Chin, Y. S. (2016). Are physical activity, sedentary behaviors and sleep duration associated with body mass index-for-age and health-related quality of life among high                                                                                                                                                                                                                                               |



|           |                                                                                                                                                                                                                                                                                                                                                                                                                                                                                                                                                     |
|-----------|-----------------------------------------------------------------------------------------------------------------------------------------------------------------------------------------------------------------------------------------------------------------------------------------------------------------------------------------------------------------------------------------------------------------------------------------------------------------------------------------------------------------------------------------------------|
|           | school boys and girls? <i>Health and Quality of Life Outcomes</i> , 14, 30. <a href="https://doi.org/10.1186/s12955-016-0434-6">https://doi.org/10.1186/s12955-016-0434-6</a>                                                                                                                                                                                                                                                                                                                                                                       |
| 664536319 | Jalilpiran, Y., Mozaffari, H., Askari, M., Jafari, A., & Azadbakht, L. (2021). The association between Healthy Beverage Index and anthropometric measures among children: A cross-sectional study. <i>Eating and Weight Disorders: EWD</i> , 26(5), 1437–1445. <a href="https://doi.org/10.1007/s40519-020-00954-z">https://doi.org/10.1007/s40519-020-00954-z</a>                                                                                                                                                                                  |
| 664536692 | Kalantari, N., Keshavarz Mohammadi, N., Izadi, P., Gholamalizadeh, M., Doaei, S., Eini-Zinab, H., Salonurmi, T., Rafieifar, S., Janipoor, R., & Azizi Tabesh, G. (2018). A complete linkage disequilibrium in a haplotype of three SNPs in Fat Mass and Obesity associated (FTO) gene was strongly associated with anthropometric indices after controlling for calorie intake and physical activity. <i>BMC Medical Genetics</i> , 19(1), 146. <a href="https://doi.org/10.1186/s12881-018-0664-z">https://doi.org/10.1186/s12881-018-0664-z</a>   |
| 664537699 | Karaca, A., Caglar, E., Bilgili, N., & Ayaz, S. (2011). Screen time of adolescents in an economically developing country: The case of Turkey. <i>Annals of Human Biology</i> , 38(1), 28–33. <a href="https://doi.org/10.3109/03014460.2010.486383">https://doi.org/10.3109/03014460.2010.486383</a>                                                                                                                                                                                                                                                |
| 664535079 | Kelishadi, R., Ardalan, G., Gheiratmand, R., Gouya, M. M., Razaghi, E. M., Delavari, A., Majdzadeh, R., Heshmat, R., Motaghian, M., Barekati, H., Mahmoud-Arabi, M. S., Riazi, M. M., & CASPIAN Study Group. (2007). Association of physical activity and dietary behaviours in relation to the body mass index in a national sample of Iranian children and adolescents: CASPIAN Study. <i>Bulletin of the World Health Organization</i> , 85(1), 19–26. <a href="https://doi.org/10.2471/blt.06.030783">https://doi.org/10.2471/blt.06.030783</a> |
| 664536613 | Kelishadi, R., Heidari, Z., Kazemi, I., Jafari-Koshki, T., Mansourian, M., Motlagh, M.-E., & Heshmat, R. (2018). A hierarchical Bayesian tri-variate analysis on factors associated with anthropometric measures in a large sample of children and adolescents: The CASPIAN-IV study. <i>Journal of Pediatric Endocrinology &amp; Metabolism: JPEM</i> , 31(4), 443–449. <a href="https://doi.org/10.1515/jpem-2017-0213">https://doi.org/10.1515/jpem-2017-0213</a>                                                                                |
| 664537902 | Kelishadi, R., Mirghaffari, N., Poursafa, P., & Gidding, S. S. (2009). Lifestyle and environmental factors associated with inflammation, oxidative stress and insulin resistance in children. <i>Atherosclerosis</i> , 203(1), 311–319. <a href="https://doi.org/10.1016/j.atherosclerosis.2008.06.022">https://doi.org/10.1016/j.atherosclerosis.2008.06.022</a>                                                                                                                                                                                   |
| 664537407 | Kelishadi, R., Razaghi, E. M., Gouya, M. M., Ardalan, G., Gheiratmand, R., Delavari, A., Motaghian, M., Ziaee, V., Siadat, Z. D., Majdzadeh, R., Heshmat, R., Barekati, H., Arabi, M. S. M., Heidarzadeh, A., Shariatinejad, K., & CASPIAN Study Group. (2007). Association of physical activity and the metabolic syndrome in children and adolescents: CASPIAN Study. <i>Hormone Research</i> , 67(1), 46–52. <a href="https://doi.org/10.1159/000096121">https://doi.org/10.1159/000096121</a>                                                   |
| 664535640 | Kerkadi, A., Sadig, A. H., Bawadi, H., Al Thani, A. A. M., Al Chetachi, W., Akram, H., Al-Hazzaa, H. M., & Musaiger, A. O. (2019). The Relationship between Lifestyle Factors and Obesity Indices among Adolescents in Qatar. <i>International Journal of Environmental Research and Public Health</i> , 16(22), 4428. <a href="https://doi.org/10.3390/ijerph16224428">https://doi.org/10.3390/ijerph16224428</a>                                                                                                                                  |
| 664539702 | Khader, Y., Irshaidat, O., Khasawneh, M., Amarin, Z., Alomari, M., & Batieha, A. (2009). Overweight and obesity among school children in Jordan: Prevalence and associated factors. <i>Maternal and Child Health Journal</i> , 13(3), 424–431. <a href="https://doi.org/10.1007/s10995-008-0362-0">https://doi.org/10.1007/s10995-008-0362-0</a>                                                                                                                                                                                                    |
| 664540155 | Khayyat-zadeh, S. S., Vatanparast, H., Avan, A., Bagherniya, M., Bahrami, A., Kiani, M. A., Bahrami-Taghanaki, H., Ferns, G. A., & Ghayour-Mobarhan, M. (2017). Serum Transaminase Concentrations and the Presence of Irritable Bowel Syndrome Are Associated with Serum 25-Hydroxy Vitamin D Concentrations in Adolescent Girls Who Are Overweight and Obese. <i>Annals of Nutrition &amp; Metabolism</i> , 71(3–4), 234–241. <a href="https://doi.org/10.1159/000484634">https://doi.org/10.1159/000484634</a>                                    |
| 664534912 | Khoo, S., & Al-Shamli, A. K. (2012). Leisure-time physical activity and physical fitness of male adolescents in Oman. <i>Asia-Pacific Journal of Public Health</i> , 24(1), 128–135. <a href="https://doi.org/10.1177/1010539510366178">https://doi.org/10.1177/1010539510366178</a>                                                                                                                                                                                                                                                                |
| 664537127 | Kilani, H., Al-Hazzaa, H., Waly, M. I., & Musaiger, A. (2013). Lifestyle Habits: Diet, physical activity and sleep duration among Omani adolescents. <i>Sultan Qaboos University Medical Journal</i> , 13(4), 510–519. <a href="https://doi.org/10.12816/0003309">https://doi.org/10.12816/0003309</a>                                                                                                                                                                                                                                              |
| 664535072 | Kin-Isler, A., Asci, F. H., Altintas, A., & Guven-Karahan, B. (2009). Physical activity levels and patterns of 11-14 year-old Turkish adolescents. <i>Adolescence</i> , 44(176), 1005–1015.                                                                                                                                                                                                                                                                                                                                                         |
| 664540170 | Koçak, S., Harris, M. B., Kin İşler, A., & Çiçek, Ş. (2002). Physical Activity Level, Sport Participation, and Parental Education Level in Turkish Junior High School Students. <i>Pediatric Exercise Science</i> , 14(2), 147–154. <a href="https://doi.org/10.1123/pes.14.2.147">https://doi.org/10.1123/pes.14.2.147</a>                                                                                                                                                                                                                         |
| 664537698 | Kocaoglu, B., Moschonis, G., Dimitriou, M., Kolotourou, M., Keskin, Y., Sur, H., Hayran, O., & Manios, Y. (2005). Parental educational level and cardiovascular disease risk factors in schoolchildren in large urban areas of Turkey: Directions for public health policy. <i>BMC Public Health</i> , 5, 13. <a href="https://doi.org/10.1186/1471-2458-5-13">https://doi.org/10.1186/1471-2458-5-13</a>                                                                                                                                           |



|           |                                                                                                                                                                                                                                                                                                                                                                                                                                                                                                       |
|-----------|-------------------------------------------------------------------------------------------------------------------------------------------------------------------------------------------------------------------------------------------------------------------------------------------------------------------------------------------------------------------------------------------------------------------------------------------------------------------------------------------------------|
| 664537065 | Kondolot, M., Poyrazoğlu, S., Horoz, D., Borlu, A., Altunay, C., Balci, E., Öztürk, A., Mazıcıoğlu, M. M., & Kurtoglu, S. (2017). Risk factors for overweight and obesity in children aged 2-6 years. <i>Journal of Pediatric Endocrinology &amp; Metabolism: JPEM</i> , 30(5), 499–505. <a href="https://doi.org/10.1515/jpem-2016-0358">https://doi.org/10.1515/jpem-2016-0358</a>                                                                                                                  |
| 664540264 | Kovács, E., Siani, A., Konstabel, K., Hadjigeorgiou, C., de Bourdeaudhuij, I., Eiben, G., Lissner, L., Gwozdz, W., Reisch, L., Pala, V., Moreno, L. A., Pigeot, I., Pohlbeln, H., Ahrens, W., Molnár, D., & IDEFICS consortium. (2014). Adherence to the obesity-related lifestyle intervention targets in the IDEFICS study. <i>International Journal of Obesity (2005)</i> , 38 Suppl 2(Suppl 2), S144–151. <a href="https://doi.org/10.1038/ijo.2014.145">https://doi.org/10.1038/ijo.2014.145</a> |
| 664537221 | Lazarou, C., & Matalas, A.-L. (2015). Breakfast intake is associated with nutritional status, Mediterranean diet adherence, serum iron and fasting glucose: The CYFamilies study. <i>Public Health Nutrition</i> , 18(7), 1308–1316. <a href="https://doi.org/10.1017/S1368980014001967">https://doi.org/10.1017/S1368980014001967</a>                                                                                                                                                                |
| 664537651 | Lazarou, C., Panagiotakos, D. B., Kouta, C., & Matalas, A.-L. (2009). Dietary and other lifestyle characteristics of Cypriot school children: Results from the nationwide CYKIDS study. <i>BMC Public Health</i> , 9, 147. <a href="https://doi.org/10.1186/1471-2458-9-147">https://doi.org/10.1186/1471-2458-9-147</a>                                                                                                                                                                              |
| 664538100 | Loucaides, C. A. (2018). Seasonal differences in segmented-day physical activity and sedentary behaviour in primary school children. <i>Early Child Development and Care</i> , 188(3), 410–420. <a href="https://doi.org/10.1080/03004430.2016.1226292">https://doi.org/10.1080/03004430.2016.1226292</a>                                                                                                                                                                                             |
| 664538311 | Loucaides, C. A. (2020). Screen time behaviour in a sample of 11- to 12-year-old Greek-Cypriot children: A cross-sectional study of parental and child reports. <i>SAGE Open Medicine</i> , 8, 205031212094623. <a href="https://doi.org/10.1177/2050312120946232">https://doi.org/10.1177/2050312120946232</a>                                                                                                                                                                                       |
| 664540077 | Loucaides, C. A., Chedzoy, S. M., & Bennett, N. (2004). Differences in physical activity levels between urban and rural school children in Cyprus. <i>Health Education Research</i> , 19(2), 138–147. <a href="https://doi.org/10.1093/her/cyg014">https://doi.org/10.1093/her/cyg014</a>                                                                                                                                                                                                             |
| 664537900 | Loucaides, C. A., & Jago, R. (2006). Correlates of Pedometer-Assessed Physical Activity in Cypriot Elementary School Children. <i>Journal of Physical Activity &amp; Health</i> , 3(3), 267–276. <a href="https://doi.org/10.1123/jpah.3.3.267">https://doi.org/10.1123/jpah.3.3.267</a>                                                                                                                                                                                                              |
| 664540144 | Loucaides, C. A., & Jago, R. (2008). Differences in physical activity by gender, weight status and travel mode to school in Cypriot children. <i>Preventive Medicine</i> , 47(1), 107–111. <a href="https://doi.org/10.1016/j.ypmed.2008.01.025">https://doi.org/10.1016/j.ypmed.2008.01.025</a>                                                                                                                                                                                                      |
| 664540274 | Loucaides, C. A., Jago, R., & Theophanous, M. (2011). Physical activity and sedentary behaviours in Greek-Cypriot children and adolescents: A cross-sectional study. <i>The International Journal of Behavioral Nutrition and Physical Activity</i> , 8, 90. <a href="https://doi.org/10.1186/1479-5868-8-90">https://doi.org/10.1186/1479-5868-8-90</a>                                                                                                                                              |
| 664537880 | Manios, Y., Dimitriou, M., Moschonis, G., Kocaoglu, B., Sur, H., Keskin, Y., & Hayran, O. (2004). Cardiovascular disease risk factors among children of different socioeconomic status in Istanbul, Turkey: Directions for public health and nutrition policy. <i>Lipids in Health and Disease</i> , 3, 11. <a href="https://doi.org/10.1186/1476-511X-3-11">https://doi.org/10.1186/1476-511X-3-11</a>                                                                                               |
| 664535170 | Manios, Y., Kolotourou, M., Moschonis, G., Sur, H., Keskin, Y., Kocaoglu, B., & Hayran, O. (2005). Macronutrient intake, physical activity, serum lipids and increased body weight in primary schoolchildren in Istanbul. <i>Pediatrics International: Official Journal of the Japan Pediatric Society</i> , 47(2), 159–166. <a href="https://doi.org/10.1111/j.1442-200x.2005.02047.x">https://doi.org/10.1111/j.1442-200x.2005.02047.x</a>                                                          |
| 664539125 | Marashi, T., Safari-Moradabadi, A., Ahmadi, F., & Alipour-Anbarani, M. (2022). The effect of education based on the theory of planned behavior on the promotion of physical activity and knowledge of students about diabetes prevention. <i>International Journal of Health Promotion and Education</i> , 60(6), 316–328. <a href="https://doi.org/10.1080/14635240.2020.1854814">https://doi.org/10.1080/14635240.2020.1854814</a>                                                                  |
| 664534252 | Mehranfar, S., Jalilpiran, Y., Surkan, P. J., & Azadbakht, L. (2020). Association between protein-rich dietary patterns and anthropometric measurements among children aged 6 years. <i>Nutrition &amp; Dietetics: The Journal of the Dietitians Association of Australia</i> , 77(3), 359–367. <a href="https://doi.org/10.1111/1747-0080.12609">https://doi.org/10.1111/1747-0080.12609</a>                                                                                                         |
| 664536584 | Miri, S. F., Javadi, M., Lin, C.-Y., Griffiths, M. D., Björk, M., & Pakpour, A. H. (2019). Effectiveness of cognitive-behavioral therapy on nutrition improvement and weight of overweight and obese adolescents: A randomized controlled trial. <i>Diabetes &amp; Metabolic Syndrome</i> , 13(3), 2190–2197. <a href="https://doi.org/10.1016/j.dsx.2019.05.010">https://doi.org/10.1016/j.dsx.2019.05.010</a>                                                                                       |
| 664534164 | Mohammadifard, N., Mahdavi, A., Khosravi, A., Esmailzadeh, A., Feizi, A., & Sarrafzadegan, N. (2021). Salt intake and its sources in children, adolescents and adults in the Islamic Republic of Iran. <i>Eastern Mediterranean Health Journal = La Revue De Sante De La Mediterranee Orientale = Al-Majallah Al-Sihhiyah Li-Sharq Al-Mutawassit</i> , 27(3), 279–286. <a href="https://doi.org/10.26719/2021.27.3.279">https://doi.org/10.26719/2021.27.3.279</a>                                    |



|           |                                                                                                                                                                                                                                                                                                                                                                                                                                                           |
|-----------|-----------------------------------------------------------------------------------------------------------------------------------------------------------------------------------------------------------------------------------------------------------------------------------------------------------------------------------------------------------------------------------------------------------------------------------------------------------|
| 664534921 | Mohseni-Takalloo, S., Mirmiran, P., Hosseini-Esfahani, F., Mehrabi, Y., & Azizi, F. (2014). Metabolic Syndrome and its Association with Healthy Eating Index-2005 in Adolescents: Tehran Lipid and Glucose Study. <i>Journal of Food and Nutrition Research</i> , 2(4), 155–161. <a href="https://doi.org/10.12691/jfnr-2-4-4">https://doi.org/10.12691/jfnr-2-4-4</a>                                                                                    |
| 664539049 | Moludi, J., Ebrahimi, B., Maleki, V., Saiedi, S., Tandoroost, A., Jafari-Vayghyan, H., Alizadeh, S., & Djafarian, K. (2020). Comparison of dietary macro and micronutrient intake with physical activity levels among children with and without autism: A case-control study. <i>Progress in Nutrition</i> , 21(2-S), 49–55. <a href="https://doi.org/10.23751/pn.v21i2-S.6578">https://doi.org/10.23751/pn.v21i2-S.6578</a>                              |
| 664534207 | Moradi, G., Mostafavi, F., Piroozi, B., Zareie, B., Mahboobi, M., & Rasouli, M. A. (2020). The prevalence of physical inactivity in Iranian adolescents and the impact of economic and social inequalities on it: Results of a National Study in 2018. <i>BMC Public Health</i> , 20(1), 1499. <a href="https://doi.org/10.1186/s12889-020-09618-0">https://doi.org/10.1186/s12889-020-09618-0</a>                                                        |
| 664534598 | Moradi-Lakeh, M., El Bcheraoui, C., Tuffaha, M., Daoud, F., Al Saeedi, M., Basulaiman, M., Memish, Z. A., Al Mazroa, M. A., Al Rabeeah, A. A., & Mokdad, A. H. (2016). The health of Saudi youths: Current challenges and future opportunities. <i>BMC Family Practice</i> , 17, 26. <a href="https://doi.org/10.1186/s12875-016-0425-z">https://doi.org/10.1186/s12875-016-0425-z</a>                                                                    |
| 664534903 | Motamed-Gorji, N., Qorbani, M., Nikkho, F., Asadi, M., Motlagh, M. E., Safari, O., Arefirad, T., Asayesh, H., Mohammadi, R., Mansourian, M., & Kelishadi, R. (2019). Association of screen time and physical activity with health-related quality of life in Iranian children and adolescents. <i>Health and Quality of Life Outcomes</i> , 17(1), 2. <a href="https://doi.org/10.1186/s12955-018-1071-z">https://doi.org/10.1186/s12955-018-1071-z</a>   |
| 664538336 | Mozafarian, N., Kelishadi, R., Motlagh, M. E., & Maracy, M. (2016). Propensity Score Application in the Relationship of Screen Time and Metabolic Syndrome in Adolescents: The CASPIAN-III Study. <i>International Journal of Pediatrics</i> , 4(3). <a href="https://doi.org/10.22038/ijp.2016.6519">https://doi.org/10.22038/ijp.2016.6519</a>                                                                                                          |
| 664535260 | Mozaffari, H., & Nabaei, B. (2007). Obesity and related risk factors. <i>Indian Journal of Pediatrics</i> , 74(3), 265–267.                                                                                                                                                                                                                                                                                                                               |
| 664534612 | Musaiger, A. O., Al-Mufti, B. A., & Al-Hazzaa, H. M. (2014). Eating habits, inactivity, and sedentary behavior among adolescents in Iraq: Sex differences in the hidden risks of noncommunicable diseases. <i>Food and Nutrition Bulletin</i> , 35(1), 12–19. <a href="https://doi.org/10.1177/156482651403500102">https://doi.org/10.1177/156482651403500102</a>                                                                                         |
| 664537198 | Najafabadi, M. G., Memari, A.-H., Kordi, R., Shayestehfar, M., & Eshghi, M.-A. (2017). Mental training can improve physical activity behavior in adolescent girls. <i>Journal of Sport and Health Science</i> , 6(3), 327–332. <a href="https://doi.org/10.1016/j.jshs.2015.09.011">https://doi.org/10.1016/j.jshs.2015.09.011</a>                                                                                                                        |
| 664534221 | Naseri, P., Amiri, P., Momenyan, S., Zayeri, F., Karimi, M., & Azizi, F. (2020). Longitudinal association between body mass index and physical activity among adolescents with different parental risk: A parallel latent growth curve modeling approach. <i>The International Journal of Behavioral Nutrition and Physical Activity</i> , 17(1), 59. <a href="https://doi.org/10.1186/s12966-020-00961-4">https://doi.org/10.1186/s12966-020-00961-4</a> |
| 664537271 | Nasreddine, L., Naja, F., Akl, C., Chamieh, M. C., Karam, S., Sibai, A.-M., & Hwalla, N. (2014). Dietary, lifestyle and socio-economic correlates of overweight, obesity and central adiposity in Lebanese children and adolescents. <i>Nutrients</i> , 6(3), 1038–1062. <a href="https://doi.org/10.3390/nu6031038">https://doi.org/10.3390/nu6031038</a>                                                                                                |
| 664536972 | Nejadsadeghi, E., Sadeghi, R., Shojaeizadeh, D., Yekaninejad, M. S., Djazayeri, A., & Majlesi, F. (2018). Influence of lifestyle factors on Body Mass Index in preschoolers in Behbahan city, southwest Iran, 2016. <i>Electronic Physician</i> , 10(4), 6725–6732. <a href="https://doi.org/10.19082/6725">https://doi.org/10.19082/6725</a>                                                                                                             |
| 664810889 | Nemet, D., Barkan, S., Epstein, Y., Friedland, O., Kowen, G., & Eliakim, A. (2005). Short- and long-term beneficial effects of a combined dietary-behavioral-physical activity intervention for the treatment of childhood obesity. <i>Pediatrics</i> , 115(4), e443–449. <a href="https://doi.org/10.1542/peds.2004-2172">https://doi.org/10.1542/peds.2004-2172</a>                                                                                     |
| 664810468 | Nemet, D., Levi, L., Pantanowitz, M., & Eliakim, A. (2014). A combined nutritional-behavioral-physical activity intervention for the treatment of childhood obesity—A 7-year summary. <i>Journal of Pediatric Endocrinology &amp; Metabolism: JPEM</i> , 27(5–6), 445–451. <a href="https://doi.org/10.1515/jpem-2013-0349">https://doi.org/10.1515/jpem-2013-0349</a>                                                                                    |
| 664536956 | Neshatbini Tehrani, A., Farhadnejad, H., Salehpour, A., Beyzai, B., Hekmatdoost, A., & Rashidkhani, B. (2019). The association between nutrition knowledge and adherence to a Mediterranean dietary pattern in Iranian female adolescents. <i>International Journal of Adolescent Medicine and Health</i> , 33(4). <a href="https://doi.org/10.1515/ijamh-2018-0188">https://doi.org/10.1515/ijamh-2018-0188</a>                                          |
| 664534744 | Ng, S. W., Zaghloul, S., Ali, H., Harrison, G., Yeatts, K., El Sadig, M., & Popkin, B. M. (2011). Nutrition transition in the United Arab Emirates. <i>European Journal of Clinical Nutrition</i> , 65(12), 1328–1337. <a href="https://doi.org/10.1038/ejcn.2011.135">https://doi.org/10.1038/ejcn.2011.135</a>                                                                                                                                          |
| 664535087 | Nitzan Kaluski, D., Demem Mazengia, G., Shimony, T., Goldsmith, R., & Berry, E. M. (2009). Prevalence and determinants of physical activity and lifestyle in relation to obesity among                                                                                                                                                                                                                                                                    |



|           |                                                                                                                                                                                                                                                                                                                                                                                                                                                        |
|-----------|--------------------------------------------------------------------------------------------------------------------------------------------------------------------------------------------------------------------------------------------------------------------------------------------------------------------------------------------------------------------------------------------------------------------------------------------------------|
|           | schoolchildren in Israel. <i>Public Health Nutrition</i> , 12(6), 774–782. <a href="https://doi.org/10.1017/S1368980008002991">https://doi.org/10.1017/S1368980008002991</a>                                                                                                                                                                                                                                                                           |
| 664539221 | Nozari, R. A., Farshbaf-Khalili, A., Sattarzadeh, N., & Jafarabadi, M. A. (2019). The Effect of Counseling on Menstrual Hygiene, Physical Activity, and Nutritional Status of Female Adolescent Students: A Randomized Controlled Field Trial. <i>Crescent Journal of Medical and Biological Sciences</i> , 6(3), 393–402.                                                                                                                             |
| 664536833 | Okur, E. O., Inal-Ince, D., Saglam, M., Vardar-Yagli, N., & Arikan, H. (2021). Physical activity patterns in children with cerebral palsy and typically developing peers. <i>Physiotherapy Theory and Practice</i> , 37(6), 710–718. <a href="https://doi.org/10.1080/09593985.2019.1641863">https://doi.org/10.1080/09593985.2019.1641863</a>                                                                                                         |
| 664538809 | Olafsdottir, S., Berg, C., Eiben, G., Lanfer, A., Reisch, L., Ahrens, W., Kourides, Y., Molnár, D., Moreno, L. A., Siani, A., Veidebaum, T., & Lissner, L. (2014). Young children's screen activities, sweet drink consumption and anthropometry: Results from a prospective European study. <i>European Journal of Clinical Nutrition</i> , 68(2), 223–228. <a href="https://doi.org/10.1038/ejcn.2013.234">https://doi.org/10.1038/ejcn.2013.234</a> |
| 664538308 | Ozmert, E. N., Ozdemir, R., Pektaş, A., Uçkardeş, Y., & Yurdakök, K. (2011). Effect of activity and television viewing on BMI z-score in early adolescents in Turkey. <i>World Journal of Pediatrics: WJP</i> , 7(1), 37–40. <a href="https://doi.org/10.1007/s12519-011-0243-2">https://doi.org/10.1007/s12519-011-0243-2</a>                                                                                                                         |
| 664810851 | Pinhas-Hamiel, O., Bar-Zvi, E., Boyko, V., Reichman, B., & Lerner-Geva, L. (2009). Prevalence of overweight in kindergarten children in the centre of Israel—Association with lifestyle habits. <i>Child: Care, Health and Development</i> , 35(2), 147–152. <a href="https://doi.org/10.1111/j.1365-2214.2008.00905.x">https://doi.org/10.1111/j.1365-2214.2008.00905.x</a>                                                                           |
| 664534826 | Platat, C., & Jarrar, A. (2012). Reliability and validity of a physical activity questionnaire in children. <i>International Journal of Food Sciences and Nutrition</i> , 63(6), 637–644. <a href="https://doi.org/10.3109/09637486.2011.644766">https://doi.org/10.3109/09637486.2011.644766</a>                                                                                                                                                      |
| 664539029 | Qahwaji, D. (2012). Physical activity and life style among Male Adolescents in Jeddah, Saudi Arabia. <i>Life Science Journal</i> , 9, 1163–1172.                                                                                                                                                                                                                                                                                                       |
| 664534478 | Rahimi, H., Yuzbashian, E., Zareie, R., Asghari, G., Djazayeri, A., Movahedi, A., & Mirmiran, P. (2020). Dietary approaches to stop hypertension (DASH) score and obesity phenotypes in children and adolescents. <i>Nutrition Journal</i> , 19(1), 112. <a href="https://doi.org/10.1186/s12937-020-00631-y">https://doi.org/10.1186/s12937-020-00631-y</a>                                                                                           |
| 664810637 | Raz-Silbiger, S., Lifshitz, N., Katz, N., Steinhart, S., Cermak, S. A., & Weintraub, N. (2015). Relationship between motor skills, participation in leisure activities and quality of life of children with Developmental Coordination Disorder: Temporal aspects. <i>Research in Developmental Disabilities</i> , 38, 171–180. <a href="https://doi.org/10.1016/j.ridd.2014.12.012">https://doi.org/10.1016/j.ridd.2014.12.012</a>                    |
| 664537025 | Rostamian, M., & Kazemi, A. (2016). Relationship between observational learning and health belief with physical activity among adolescents girl in Isfahan, Iran. <i>Iranian Journal of Nursing and Midwifery Research</i> , 21(6), 601–604. <a href="https://doi.org/10.4103/1735-9066.197681">https://doi.org/10.4103/1735-9066.197681</a>                                                                                                           |
| 664539146 | Rostami-Moez, M., Hazavehei, S. M. M., Karami, M., Karimi-Shahanjari, A., Nazem, F., & Rezapour-Shahkolai, F. (2017). Decline in Physical Activity Among Iranian Girl Students Aged 10 to 16 and the Related Factors. <i>Health Scope, In Press(In Press)</i> . <a href="https://doi.org/10.5812/jhealthscope.62422">https://doi.org/10.5812/jhealthscope.62422</a>                                                                                    |
| 664534732 | Safiri, S., Kelishadi, R., Qorbani, M., Abbasi-Ghah-Ramanloo, A., Motlagh, M. E., Ardalan, G., Shafiee, G., Ahadi, Z., Sanaei, M., Asayesh, H., Larijani, B., & Heshmat, R. (2015). Screen time and its relation to cardiometabolic risk among children and adolescents: The CASPIAN-III study. <i>Iranian Journal of Public Health</i> , 44(1), 35–44.                                                                                                |
| 664539589 | Saglam, D., Samur, G., & Turan, S. (2019). Assessment of vitamin D status in turkish adolescents: Its relation to obesity, cardiometabolic risk factors and nutritional status. <i>Progress in Nutrition</i> , 21(4), 762–768. <a href="https://doi.org/10.23751/pn.v21i4.6850">https://doi.org/10.23751/pn.v21i4.6850</a>                                                                                                                             |
| 664537759 | Salamoun, M. M., Kizirian, A. S., Tannous, R. I., Nabulsi, M. M., Choucair, M. K., Deeb, M. E., & El-Hajj Fuleihan, G. A. (2005). Low calcium and vitamin D intake in healthy children and adolescents and their correlates. <i>European Journal of Clinical Nutrition</i> , 59(2), 177–184. <a href="https://doi.org/10.1038/sj.ejcn.1602056">https://doi.org/10.1038/sj.ejcn.1602056</a>                                                             |
| 664534616 | Sanaeinasab, H., Saffari, M., Nazeri, M., Karimi Zarchi, A., & Cardinal, B. J. (2013). Descriptive analysis of Iranian adolescents' stages of change for physical activity behavior. <i>Nursing &amp; Health Sciences</i> , 15(3), 280–285. <a href="https://doi.org/10.1111/nhs.12020">https://doi.org/10.1111/nhs.12020</a>                                                                                                                          |
| 664535071 | Sanaeinasab, H., Tavakoli, R., Karimizarchi, A., Amini, Z. H., Farokhian, A., & Najarkolaei, F. R. (2014). The effectiveness of education using the health belief model in preventing osteoporosis among female students. <i>Eastern Mediterranean Health Journal = La Revue De Sante De La Mediterranee Orientale = Al-Majallah Al-Sihhiyah Li-Sharq Al-Mutawassit</i> , 19 Suppl 3, S38-44.                                                          |
| 664534214 | Sarsour, A., Turban, M., Al Wahaidi, A., Abed, Y., & Alkahlout, H. (2019). Does gender influence food intake and physical activity pattern among Palestinian adolescents in the Gaza Strip? <i>Eastern</i>                                                                                                                                                                                                                                             |



|           |                                                                                                                                                                                                                                                                                                                                                                                                                                                  |
|-----------|--------------------------------------------------------------------------------------------------------------------------------------------------------------------------------------------------------------------------------------------------------------------------------------------------------------------------------------------------------------------------------------------------------------------------------------------------|
|           | <i>Mediterranean Health Journal = La Revue De Sante De La Mediterranee Orientale = Al-Majallah Al-Sihhiyah Li-Sharq Al-Mutawassit</i> , 25(10), 722–727. <a href="https://doi.org/10.26719/emhj.19.073">https://doi.org/10.26719/emhj.19.073</a>                                                                                                                                                                                                 |
| 664539193 | Saygin, O. (2014). Physical Activity Level and Obesity Prevalence of Primary and Secondary Students. <i>The Anthropologist</i> , 18(2), 371–377. <a href="https://doi.org/10.1080/09720073.2014.11891555">https://doi.org/10.1080/09720073.2014.11891555</a>                                                                                                                                                                                     |
| 664537646 | Saygin, O., Zorba, E., Karacabey, K., & Mengutay, S. (2007). Gender and maturation differences in health-related physical fitness and physical activity in Turkish children. <i>Pakistan Journal of Biological Sciences: PJBS</i> , 10(12), 1963–1969. <a href="https://doi.org/10.3923/pjbs.2007.1963.1969">https://doi.org/10.3923/pjbs.2007.1963.1969</a>                                                                                     |
| 664540060 | Sedaghat, F., Naja, F., Darand, M., Beyzai, B., & Rashidkhani, B. (2017). Adherence to a Mediterranean dietary pattern and overweight and obesity among female adolescents in Iran. <i>International Journal of Adolescent Medicine and Health</i> , 31(2), /j/ijamh.2019.31.issue-2/ijamh-2016-0160/ijamh-2016-0160.xml. <a href="https://doi.org/10.1515/ijamh-2016-0160">https://doi.org/10.1515/ijamh-2016-0160</a>                          |
| 664810396 | Sherman, G., Nemet, D., Moshe, V., Consolaro, A., Ravelli, A., Ruperto, N., Uziel, Y., & Paediatric Rheumatology International Trials Organisation (PRINTO). (2018). Disease activity, overweight, physical activity and screen time in a cohort of patients with juvenile idiopathic arthritis. <i>Clinical and Experimental Rheumatology</i> , 36(6), 1110–1116.                                                                               |
| 664535015 | Shokrvash, B., Majlessi, F., Montazeri, A., Nedjat, S., Rahimi, A., Djazayeri, A., & Shojaezadeh, D. (2013). Correlates of physical activity in adolescence: A study from a developing country. <i>Global Health Action</i> , 6, 20327. <a href="https://doi.org/10.3402/gha.v6i0.20327">https://doi.org/10.3402/gha.v6i0.20327</a>                                                                                                              |
| 664534653 | Simsek, S., Inal-Ince, D., Cakmak, A., Emiralioglu, N., Calik-Kutukcu, E., Saglam, M., Vardar-Yagli, N., Ozcelik, H. U., Sonbahar-Ulu, H., Bozdemir-Ozel, C., Kiper, N., & Arikian, H. (2018). Reduced anaerobic and aerobic performance in children with primary ciliary dyskinesia. <i>European Journal of Pediatrics</i> , 177(5), 765–773. <a href="https://doi.org/10.1007/s00431-018-3121-2">https://doi.org/10.1007/s00431-018-3121-2</a> |
| 664534160 | Smith, E., Fazeli, F., Wilkinson, K., & Clark, C. C. T. (2021). Physical behaviors and fundamental movement skills in British and Iranian children: An isomtemporal substitution analysis. <i>Scandinavian Journal of Medicine &amp; Science in Sports</i> , 31(2), 398–404. <a href="https://doi.org/10.1111/sms.13837">https://doi.org/10.1111/sms.13837</a>                                                                                   |
| 664540021 | Soltanian, A. R., Amiri, M., Namazi, S., Qaedi, H., & Kohan, G. R. (2014). Mental Health Changes and Its Predictors in Adolescents using the Path Analytic Model: A 7-Year Observational Study. <i>Iranian Journal of Psychiatry</i> , 9(1), 1–7.                                                                                                                                                                                                |
| 664538642 | Sourtiji, H., Hosseini, S. A., Rassafiani, M., Kohan, A., Noroozi, M., & Motlagh, M. E. (2018). The Associations Between Screen Time, Sleep Duration, and Body Mass Index (BMI) in Under Five-Year-Old Children. <i>Archives of Neuroscience, In Press(In Press)</i> . <a href="https://doi.org/10.5812/ans.81229">https://doi.org/10.5812/ans.81229</a>                                                                                         |
| 664535168 | Sur, H., Kolotourou, M., Dimitriou, M., Kocaoglu, B., Keskin, Y., Hayran, O., & Manios, Y. (2005). Biochemical and behavioral indices related to BMI in schoolchildren in urban Turkey. <i>Preventive Medicine</i> , 41(2), 614–621. <a href="https://doi.org/10.1016/j.ypmed.2004.11.029">https://doi.org/10.1016/j.ypmed.2004.11.029</a>                                                                                                       |
| 664537660 | Tarakci, E., Yeldan, I., Kaya Mutlu, E., Baydogan, S. N., & Kasapcopur, O. (2011). The relationship between physical activity level, anxiety, depression, and functional ability in children and adolescents with juvenile idiopathic arthritis. <i>Clinical Rheumatology</i> , 30(11), 1415–1420. <a href="https://doi.org/10.1007/s10067-011-1832-0">https://doi.org/10.1007/s10067-011-1832-0</a>                                             |
| 664538202 | Taymoori, P., & Lubans, D. R. (2008). Mediators of behavior change in two tailored physical activity interventions for adolescent girls. <i>Psychology of Sport and Exercise</i> , 9(5), 605–619. <a href="https://doi.org/10.1016/j.psychsport.2007.09.001">https://doi.org/10.1016/j.psychsport.2007.09.001</a>                                                                                                                                |
| 664535123 | Taymoori, P., Niknami, S., Berry, T., Ghofranipour, F., & Kazemnejad, A. (2009). Application of the health promotion model to predict stages of exercise behaviour in Iranian adolescents. <i>Eastern Mediterranean Health Journal = La Revue de Santé de La Méditerranée Orientale = Al-Majallah al-Sihhiyah Li-Sharq al-Mutawassit</i> , 15, 1215–1225.                                                                                        |
| 664534966 | Taymoori, P., Rhodes, R. E., & Berry, T. R. (2010). Application of a social cognitive model in explaining physical activity in Iranian female adolescents. <i>Health Education Research</i> , 25(2), 257–267. <a href="https://doi.org/10.1093/her/cyn051">https://doi.org/10.1093/her/cyn051</a>                                                                                                                                                |
| 664534914 | Taymoori, P., Berry, T. R., & Lubans, D. R. (2012). Tracking of physical activity during middle school transition in Iranian adolescents. <i>Health Education Journal</i> , 71(6), 631–641. <a href="https://doi.org/10.1177/0017896911419341">https://doi.org/10.1177/0017896911419341</a>                                                                                                                                                      |
| 664540166 | Teber, S., Saglam, M., Ertugrul, I., Vardar-Yagli, N., Cakmak, A., Calik-Kutukcu, E., Inal-Ince, D., Arikian, H., & Karagoz, T. (2020). Levels of Physical Activity and Physical Fitness in Pediatric Pacemaker Patients: A Cross-Sectional Study. <i>Pediatric Cardiology</i> , 41(7), 1363–1369. <a href="https://doi.org/10.1007/s00246-020-02384-1">https://doi.org/10.1007/s00246-020-02384-1</a>                                           |
| 664540008 | Tayyem, R., Al-Hazzaa, H., Abumweis, S., Bawadi, H., Musaiger, A., & Qatatsheh, A. (2014). Association of Lifestyle Factors with Obesity Indices among Adolescents Living in Amman. <i>Malaysian Journal of Nutrition</i> , 20, 51–62.                                                                                                                                                                                                           |



|           |                                                                                                                                                                                                                                                                                                                                                                                        |
|-----------|----------------------------------------------------------------------------------------------------------------------------------------------------------------------------------------------------------------------------------------------------------------------------------------------------------------------------------------------------------------------------------------|
| 664540006 | Tayyem, R. F., Al-Hazzaa, H. M., Abu-Mweis, S. S., Bawadi, H. A., Hammad, S. S., Musaiger, A. O. (2014). Dietary habits and physical activity levels in Jordanian adolescents attending private versus public schools. <i>Eastern Mediterranean Health Journal = La Revue De Sante De La Mediterranee Orientale = Al-Majallah Al-Sihhiyah Li-Sharg Al-Mutawassit</i> , 20(7), 416–423. |
| 664537093 | Yiallourous, P. K., Economou, M., Kolokotroni, O., Savva, S. C., Gavatha, M., Ioannou, P., Karpathios, T., & Middleton, N. (2015). Gender differences in objectively assessed physical activity in asthmatic and non-asthmatic children. <i>Pediatric Pulmonology</i> , 50(4), 317–326. <a href="https://doi.org/10.1002/ppul.23045">https://doi.org/10.1002/ppul.23045</a>            |
| 664537295 | Yilmaz, G., Demirli Caylan, N., & Karacan, C. D. (2015). An intervention to preschool children for reducing screen time: A randomized controlled trial. <i>Child: Care, Health and Development</i> , 41(3), 443–449. <a href="https://doi.org/10.1111/cch.12133">https://doi.org/10.1111/cch.12133</a>                                                                                 |
| 664539158 | Yurdakul, H. Ö., & Baydemir, B. (2020). Comparison of physical activity and skinfold thickness of students living in rural and city center. <i>Pedagogy of Physical Culture and Sports</i> , 24(5), 271–277. <a href="https://doi.org/10.15561/26649837.2020.0508">https://doi.org/10.15561/26649837.2020.0508</a>                                                                     |



Table S5. Extracted PA and SB data from all studies identified.

Notes: All data were extracted that met the definition of daily volume of PA or SB. As far as possible the results are reported in terms of the original paper's terminology.

See S4 for a full list of the references used.

<Excel spreadsheet>
